# 1 Conditioning by Subthreshold 2 Synaptic Input Changes the 3 Characteristic Firing Pattern of CA3 4 Hippocampal Neurons

5 Saray Soldado-Magraner<sup>1,†\*</sup>, Federico Brandalise<sup>2,3,†</sup>, Suraj Honnuraiah<sup>1</sup>, Michael  
6 Pfeiffer<sup>1\*</sup>, Urs Gerber<sup>2\*</sup>, Rodney Douglas<sup>1\*</sup>

\*For correspondence:

[ssaray@ini.uzh.ch](mailto:ssaray@ini.uzh.ch)

†These authors contributed equally  
to this work

7 <sup>1</sup>Institute of Neuroinformatics, University of Zurich and ETH Zurich, Switzerland; <sup>2</sup>Brain  
8 Research Institute, University of Zurich, Switzerland; <sup>3</sup>Center for Learning and Memory,  
9 University of Texas at Austin.

---

11 **Abstract** Neurons are typically classified according to their intrinsic firing patterns and distinctive  
12 morphological features. However, we found that the in vitro patterns of neurons in the CA3 field of  
13 the rat hippocampus change very significantly following a short period of low frequency  
14 subthreshold stimulation of their afferents. This effect could be reproduced by intrasomatic  
15 current pulses and was blocked by kinase inhibitors. Cluster analysis of the firing patterns before  
16 and after conditioning revealed systematic transitions towards adapting and intrinsic burst  
17 behaviours, irrespective of the initial pattern exhibited by the cell. Using a conductance-based  
18 model, we demonstrate that the observed transitions can be mediated by recruitment of calcium  
19 and M-type potassium conductances. We conclude that CA3 neurons adapt their conductance  
20 profile to the statistics of ongoing activity in their embedding circuits, making their intrinsic firing  
21 pattern not a constant signature, but rather the reflection of long-term circuit activity.

---

## 23 Introduction

24 It is widely accepted that the diversity of morphological, molecular, and electrophysiological proper-  
25 ties exhibited by neurons of the neocortex and hippocampus reflects functionally distinct classes of  
26 cells (*Ramon y Cajal, 1893; McCormick et al., 1985; Ren et al., 1992; DeFelipe, 1993; Kawaguchi and*  
27 *Kubota, 1997; Markram et al., 2004; Somogyi and Klausberger, 2005*). In particular, neurons have  
28 been classified electrophysiologically according to the pattern of their action potential discharge  
29 in response to applied intra-somatic step currents. Many studies have reported that excitatory  
30 and different types of inhibitory neurons, identified by morphology and molecular markers, exhibit  
31 distinct firing patterns (*Connors and Gutnick, 1990; Cauli et al., 2000; Markram et al., 2004; Butt*  
32 *et al., 2005; Dumitriu et al., 2007; Hemond et al., 2008; Tasic et al., 2016*). These responses may be  
33 for example: adapting, accelerating, bursting, or fast spiking. With rare exceptions (*Steriade, 2004*),  
34 the patterns are assumed to be a sufficiently stable property of a neuron to be used as a basis for  
35 phenotypic classification (*Markram et al., 2004; Ascoli et al., 2008; Tricoire et al., 2011; Van Aerde*  
36 *and Feldmeyer, 2015*). A prominent view is that genetic factors determine both the morphology and  
37 the distinct firing patterns of individual neurons (*Ascoli et al., 2008*). However, there are substantial  
38 reasons to doubt that discharge patterns are indeed static properties of neurons. The discharge  
39 response of a neuron depends on the distribution and activations of the membrane conductances

40 that it expresses (Hille, 2001; Markram et al., 2004). This distribution is subject to homeostatic  
41 control including up- or down-regulation of conductances in response to the neuron's own activity  
42 (Turrigiano et al., 1995; Turrigiano and Nelson, 2004; Marder and Goaillard, 2006). For example,  
43 somatogastric ganglion (STG) neurons of the lobster change their firing patterns in response to  
44 network isolation by changing the balance between inward and outward currents (Turrigiano et al.,  
45 1995). Furthermore, neurons have conserved molecular pathways that link network activity to the  
46 recruitment of genes and signaling factors implicated in neural excitability (Flavell and Greenberg,  
47 2008; Cohen and Greenberg, 2008), and activity-dependent maturation is indeed necessary for the  
48 emergence of the whole spectrum of electrical types (Moody and Bosma, 2005; García et al., 2011).  
49 In final agreement with this hypothesis, a recent study shows for the first time that the electrical  
50 properties of different types of basket cells can be interchanged in response to neural activity  
51 (Dehorter et al., 2015). These lines of evidence suggest that the firing pattern is not a static charac-  
52 teristic of the cell, but rather the consequence of adaptive mechanisms that adjust the behavior  
53 of the neuron in response to the patterns of activity in its embedding network. We have explored  
54 this hypothesis using whole-cell recordings from neurons in the CA3 region of rat hippocampus in  
55 organotypic cultures. The discharge patterns of neurons in response to constant current injection  
56 were characterized before and after a conditioning phase of periodic subthreshold synaptic stimu-  
57 lation. It was found that pre-conditioned cells could indeed be classified according to the type of  
58 their discharge pattern. However, conditioning by subthreshold synaptic input elicited significant  
59 changes in the behavior of most of the neurons examined, requiring substantial re-classification of  
60 their type. This effect was reproduced when conditioning the cells via intra-somatic current pulses.  
61 The effect was blocked by adding protein kinase A (PKA) and protein kinase C (PKC) inhibitors to the  
62 recording pipette, suggesting that changes are mediated at the single cell level via phosphorylation.  
63 We used a conductance-based single compartment neuron model to explore which changes in  
64 the neuronal conductance profile could underlay the observed changes in discharge pattern. We  
65 found that the results can be explained by a recruitment of voltage dependent calcium and M-type  
66 potassium ion channels. We conclude that CA3 neurons can indeed adapt their output patterns in  
67 response to circuit activity by possibly tuning key conductances.

## 68 Results

### 69 Firing patterns of CA3 neurons change after subthreshold stimulation

70 Whole-cell patch clamp recordings of CA3 neurons were performed in rat hippocampal organotypic  
71 cultures. The intrinsic firing patterns of the neurons were recorded before and after conditioning  
72 by extracellular stimulation of the mossy fibers originating in the dentate gyrus. The conditioning  
73 stimuli consisted of paired pulses (0.1 ms duration pulses, interval 10 – 20 ms) applied at 1 Hz, and  
74 repeated 500 times for a total period of approximately 8 minutes. The amplitude of the pulses  
75 was adjusted for each recorded cell to elicit only subthreshold excitatory post-synaptic potentials  
76 (EPSPs). This mossy fiber stimulation protocol is a modification of that described by Brandalise and  
77 Gerber (2014); Brandalise et al. (2016), which has been previously shown to elicit heterosynaptic  
78 subthreshold plasticity in CA3 pyramidal-pyramidal synapses. The firing patterns of neurons were  
79 assessed with a sequence of constant current injections. For convenience, we used the terminology  
80 of the Petilla classification (Ascoli et al., 2008) to label these patterns. Interestingly, we observed  
81 that after the conditioning protocol, the Petilla discharge label had to be adapted for most of the  
82 cells, independently of their initial firing type. For example, the pyramidal cell shown in Figure 1A  
83 had a non-adapting burst pattern before stimulation (gray traces). After conditioning (blue traces),  
84 this response changed to intrinsic burst. The same transition was observed for the pyramidal cell  
85 on panel 1B, whose initial pattern was delayed accelerating. The bipolar cell on panel 1C switched  
86 from non-adapting continuous to adapting continuous firing. We observed that the most common  
87 transition performed by the cells was towards adapting and intrinsic burst patterns. Indeed, the  
88 quantification of the mean fraction of spikes in the first half versus the second half of the voltage

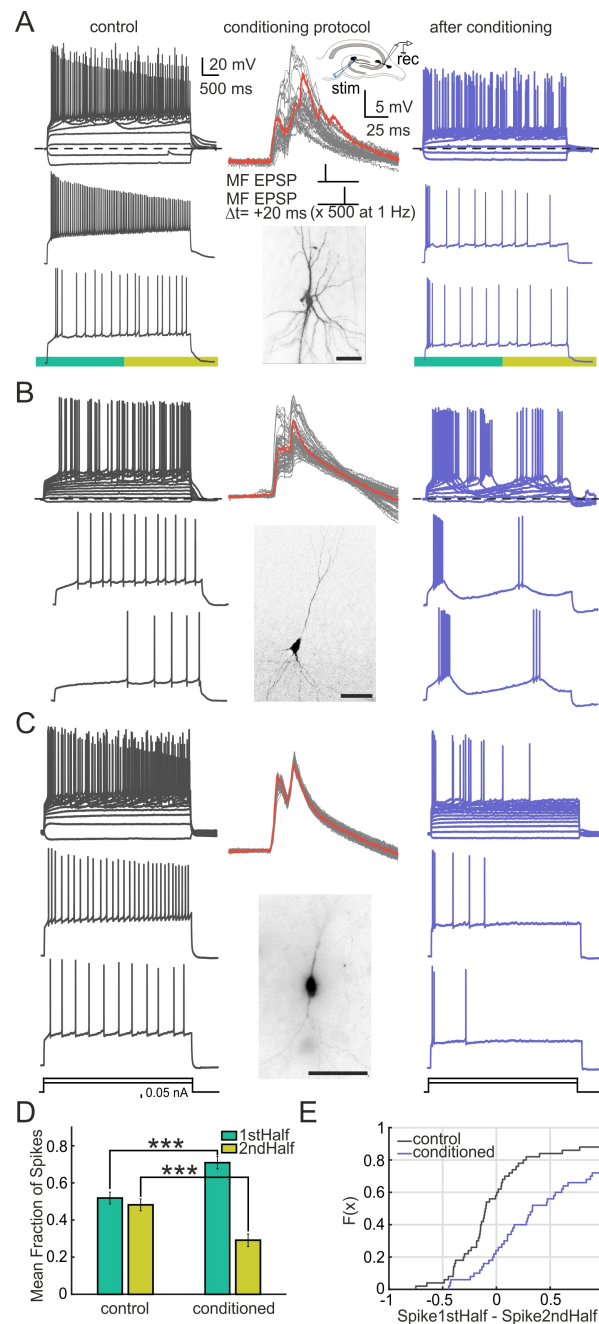

**Figure 1. Firing pattern transitions occur in CA3 neurons after subthreshold paired-pulse stimulation of afferents.** Three examples of neurons in the CA3 area presenting different morphologies and different firing patterns in control conditions. The discharge patterns were measured by injection of step currents of increasing amplitude. Control measurements (gray traces, left) were followed by stimulation of the mossy fibers. The upper trace shows all voltage traces elicited upon different levels of current injection on that cell. Two sample traces of this set are shown below. EPSPs (middle panel) were evoked in response to a stimulation with double current pulses, separated by 20 ms and repeated 500 times at 1 Hz. The series of repeated pulses are shown superimposed. A sample trace is highlighted in red. The inset shows the configuration of recording and stimulating electrodes (on the CA3 region of the hippocampus and on the dentate gyrus, respectively). Below, the morphology obtained by labeling the cells with biocytin is shown. After the conditioning, patterns were measured again (blue traces, right). A) Pyramidal cell switches from non-adapting burst to intrinsic burst firing. B) Pyramidal cell switches from delay accelerating to intrinsic burst continuous pattern. C) Bipolar cell switches from non-adapting continuous to adapting continuous firing (scale bars = 50). D) Mean Fraction of Spikes for the population in the first and second half of the voltage trace (green and yellow rectangle below the trace, respectively) for both control and conditioned cases. A significant redistribution on the fraction of spikes is observed after the conditioning, where the fraction of spikes on the first half is increased while it decreases in the second half ( $n=50$ ,  $p=1.92e-6$ , two-sided Wilcoxon signed rank test). E) Empirical Cumulative Distribution Function for the data shown in D. Every individual cell, for both control and conditioned cases, is represented as the number of spikes for the first half of the trace minus the spikes for the second half ( $n=50$ )

89 for the population of recorded cells showed a distribution of the spikes in favor of the first half  
90 (Figures 1D, 1E) (n=50). This result supports our observations that the main pattern transitions  
91 are towards adapting and intrinsic burst behaviors after the conditioning. These changes in firing  
92 pattern were present in most cells immediately after the stimulation protocol, and were stable at  
93 least 15 minutes after the stimulation. The mossy fiber conditioning was followed by a significant  
94  $36 \text{ M}\Omega$  (25%) decrease in input resistance ( $R_{in}$ ), (from  $144.8 \pm 73.0 \text{ M}\Omega$  to  $108.4 \pm 65.3 \text{ M}\Omega$ , two-sided  
95 Wilcoxon signed rank test,  $p=1.1 \times 10^{-5}$ ). There was also a significant 5 mV (7%) depolarization of  
96 the resting membrane potential ( $V_m$ ) ( $-65.3 \pm 5.0 \text{ mV}$ ) with respect to resting level ( $-70.4 \pm 5.7 \text{ mV}$ ,  
97 two-sided Wilcoxon signed rank test,  $p=2.3 \times 10^{-5}$ ,  $n = 50$ ). However, the firing pattern changes could  
98 not be induced neither by simply holding the resting membrane potential at different values  
99 (see supplementary Figure S1,  $n = 10$ ), nor by the step-currents used to measure the discharge  
100 patterns (see supplementary Figure S1,  $n = 15$ ). No significant changes in  $V_m$  and  $R_{in}$  in cells  
101 were found in unconditioned cells ( $V_m$ :  $-69.3 \pm 2.0 \text{ mV}$ ,  $-69.1 \pm 1.9 \text{ mV}$ , paired t-test,  $p=0.64$ ,  $R_{in}$ :  
102  $148.8 \pm 56.1 \text{ M}\Omega$ ,  $158.9 \pm 55.6 \text{ M}\Omega$ , paired t-test,  $p=0.063$ ,  $n = 15$ ). Intracellular dialysis could also be  
103 excluded as the cause of the pattern transitions, as firings did not change spontaneously over time  
104 (see supplementary Figure S1). In addition, we assessed that the effect was also present under  
105 conditions where dialysis was minimized (see supplementary Figure S2,  $n = 15$ ).

### 106 **Firing pattern transitions occur also via somatic conditioning and are blocked by** 107 **protein kinase A and C inhibitors**

108 We attempted to resolve if synaptic input was necessary to elicit the changes, or whether they could  
109 be induced directly at the soma. To this end, we used intra-somatic injection of paired step current  
110 pulses whose parameters were chosen to elicit a similar somatic voltage response compared  
111 to that generated by the mossy fiber stimulation (Figure 2). This direct subthreshold somatic  
112 stimulus evoked changes in discharge pattern that were similar to those elicited by the indirect  
113 mossy stimulation. The cell in Figure 2A displayed a delay accelerating firing pattern in control  
114 conditions and underwent a transition towards intrinsic burst pattern after somatic conditioning.  
115 The population data showed a significant redistribution in the fraction of spikes in favor of the  
116 first half of the trace versus the second half after the conditioning (Figure 1B and C) (n=12). In  
117 this result we observed the same tendency of neurons to become adapting and intrinsic burst  
118 after conditioning. Furthermore, due to the nature of the conditioning at the soma, this result  
119 also suggests that the mechanism inducing the firing pattern change is not localized to synapses,  
120 but rather acts at a more central, probably somatic or proximal dendritic level. We next sought to  
121 identify what internal mechanism could be responsible for the firing pattern transitions. The firing  
122 pattern of the cell depends on the distribution of membrane ion channels that the cell presents  
123 at its membrane (Hille, 2001). A possible mechanism would act upon this distribution. Due to  
124 the time scale of the response (on the order of minutes) we ruled out protein synthesis of new  
125 channels on the membrane. An alternative would be channel phosphorylation, a mechanism  
126 known to affect the conductance on a relatively short timescale (Davis et al., 2001). We reproduced  
127 the conditioning protocol in the presence of the PKA and PKC inhibitors H-89 and Go 6983 in the  
128 intracellular recording pipette. On Figure 2D a cell whose firing pattern in control conditions was  
129 delay accelerating is shown. After mossy fiber conditioning in the presence of the inhibitors the  
130 cell remained under this pattern. 84% of cells showed no visible modulation of the Petilla label  
131 pattern (11 out of the 13 cells). Panels 2E and F show the population response for cells stimulated  
132 under these conditions. No significant redistribution of the spikes was found on the presence of  
133 the inhibitors (n=13). These results suggest that phosphorylation is implicated in the mechanism of  
134 firing pattern transition.

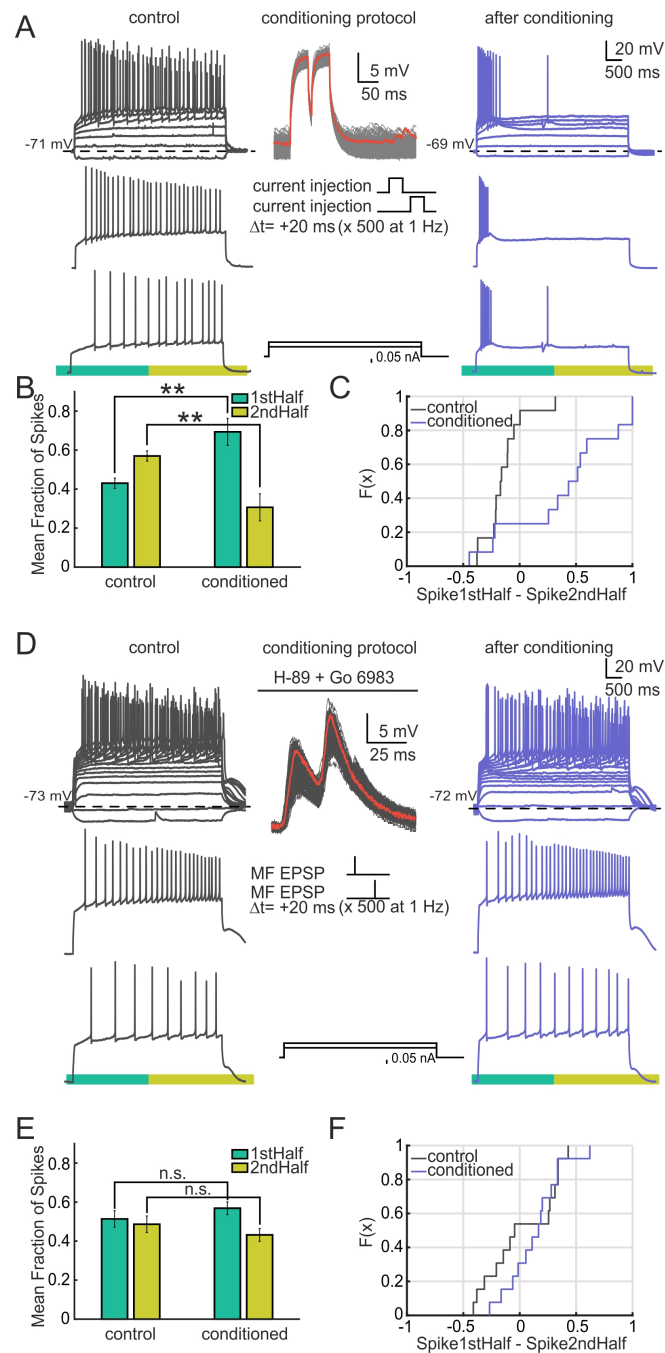

**Figure 2. CA3 firing pattern transitions occur upon somatic conditioning and are blocked by kinase inhibitors. A)** Example of an intrasomatic conditioned cell that switch from delay accelerating (gray traces) to intrinsic burst firing (blue traces). The conditioning protocol is shown in the middle column. EPSPs were evoked by injection of paired current steps, of 50 ms in duration and separated by 20 ms. The double steps were repeated 500 times at 1 Hz. The series of repeated pulses are shown superimposed. A sample trace is shown in red. **B)** Mean Fraction of Spikes for the population in the first and second half of the voltage trace for both control and conditioned cases. A significant redistribution of the fraction of spikes occurs after the conditioning. The fraction of spikes on the first half is increased while it decreases in the second half ( $n=12$ ,  $p=0.0024$ , two-sided Wilcoxon signed rank test). **C)** Empirical Cumulative Distribution Function for the data shown in B. Every individual cell is represented as the number of spikes for the first half of the trace minus the spikes for the second half ( $n=12$ ). **D)** Example of a mossy fiber conditioned cell (as described in Figure 1) under the presence of H-89 and Go 6983 (PKA and PKC inhibitors) on the intracellular pipette. The cell presents a delay accelerating pattern in control conditions and remains under such pattern after the conditioning protocol is applied. **E)** Mean Fraction of Spikes for the population in the first and second half of the voltage trace for both control and conditioned cases. The redistribution of the fraction of spikes was not significant after the conditioning ( $n=13$ ,  $p=0.266$ , two-sided Wilcoxon signed rank test). **F)** Empirical Cumulative Distribution Function for the data shown in D. Every individual cell is represented as the number of spikes for the first half of the trace minus the spikes for the second half ( $n=13$ ).

## 135 **Cluster analysis of experimental traces: quantification of identity changes in neu-** 136 **rons**

137 We observed that the conditioning induced firing pattern changes from more regular patterns to-  
138 wards early bursting and adapting patterns. We sought to quantify these changes using hierarchical  
139 clustering methods (*Druckmann et al., 2013; Tricoire et al., 2011; Hosp et al., 2014*) to establish  
140 more objectively which discharge type to associate to every response, and to quantify the frequen-  
141 cies of transitions between them. Previous studies have used clustering methods to quantify the  
142 similarity between vectors of features extracted from the voltage traces, such as action potential (AP)  
143 amplitude, firing rate, or accommodation index (*Druckmann et al., 2013; Tricoire et al., 2011; Hosp*  
144 *et al., 2014*). However, those metrics are not suitable for our dataset, because several features  
145 commonly used in those methods are unaffected by the conditioning. For example, AP amplitude,  
146 width and afterhyperpolarization (AHP) showed no difference before and after the stimulation (AP  
147 amplitude:  $78.63 \pm 14.95\text{mV}$ ,  $75.60 \pm 9.77\text{mV}$ , paired t-test,  $p=0.11$ , AP half width:  $1.11 \pm 0.26\text{ms}$ ,  
148  $1.10 \pm 0.24\text{ms}$ , paired t-test,  $p=0.74$ , AHP:  $13.62 \pm 3.76\text{mV}$ ,  $12.66 \pm 4.15\text{mV}$ , paired t-test,  $p=0.12$ ,  $n =$   
149  $50$ ). Consequently, we chose to use Dynamic Time Warping (DTW) as a comparison metric, because  
150 it operates directly on the action potential sequence rather than relying on a pre-defined set of  
151 features (see Methods for a detailed explanation). Feature vectors of the instantaneous firing rate  
152 of the voltage traces were compared pairwise using the DTW algorithm. As an internal control,  
153 vectors coming from the same set of step current injections of a cell were treated independently.  
154 The results of the cluster analysis of discharge patterns are shown in Figure 3. We set the threshold  
155 of the clustering tree at a level that separates the traces into 5 distinct families. The threshold was  
156 chosen large enough to yield sufficient structure to interpret the hierarchy in terms of recognized  
157 response types (*Ascoli et al., 2008*). Representative traces of each family are shown in Figure 3B.  
158 The average of the firing rate vectors of every cluster is depicted beneath each representative  
159 trace. The clustering algorithm captures well the typical time courses of the firing patterns. The  
160 right branch of the cluster tree contains accelerating and non-adapting firing patterns, while the  
161 other contains adapting and intrinsic bursting patterns together with a smaller group of traces  
162 that have delayed spiking profiles (Figure 3A). The consistency of the algorithm was confirmed  
163 by its successful clustering of independent feature vectors derived from the same set of current  
164 injections (same cell under the same conditions) into a single cluster. Indeed, in 86% of cases (43  
165 of the 50 cells) the algorithm successfully allocated the majority of vectors from the same set of  
166 current injections into single clusters. Vectors from the 7 remaining cells were not consistently  
167 classified. For 50% of the cells all of their voltage traces fell into the same cluster, and for 90%  
168 of the cells at least 50% did (see supplementary Figure S3). The allocation of some responses  
169 from the same cell into more than a single cluster does however follow a biological logic. For  
170 example, for cells classified as accelerating, some of their voltage traces could reasonably fall into  
171 the non-adapting cluster because acceleration may vanish at high current injections. A similar  
172 reasonable misclassification is possible for adapting traces. In this case low current injections may  
173 be classified as non-adapting because the currents are not high enough to elicit adaptation (see  
174 supplementary Figure S4). In particular, many of the traces belonging to the delayed spiking cluster  
175 come from cells whose traces at low current injections were assigned to the accelerating cluster, or  
176 belonged to non-adapting cells with spiking delay. The transitions between cluster types induced  
177 by the stimulation protocol are shown in Figure 3C. This figure considers only those cells in which  
178 responses both before and after conditioning could be clearly assigned to a cluster. In total, 68%  
179 of the cells ( $n = 50$ ) changed their original cluster as a result of subthreshold conditioning. This  
180 quantitative result supports the qualitative observation that cells tend to transition towards more  
181 adapting and intrinsic burst profiles. 70% of cells initially belonging to the non-adapting cluster  
182 exhibited such changes in response (14 cells), with 35% moving into the intrinsic burst category, and  
183 35% exhibiting adapting spike patterns. 5 of the 6 cells from the adapting cluster (83%) switched to  
184 the intrinsic burst type. Most of the cells for which the firing pattern did not change were already

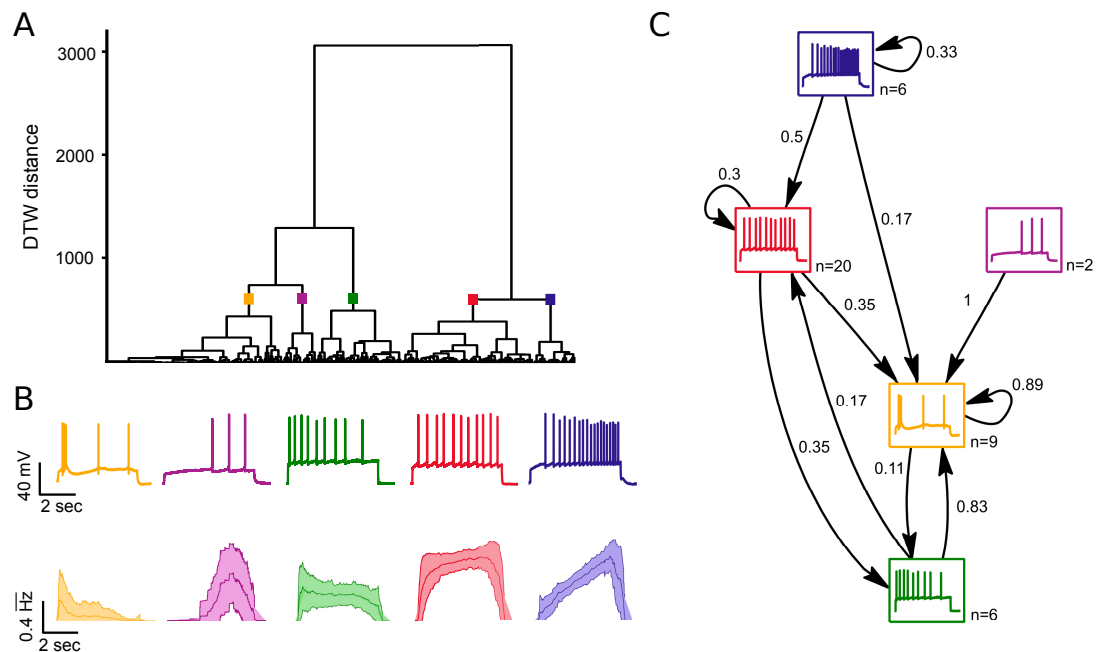

**Figure 3. Hierarchical clustering of experimental discharge traces.** A) Dendrogram of clustered traces. The data included in the cluster corresponds to the mossy fiber conditioned cells of Figure 1. Two main families can be identified: one containing adapting and bursting traces, together with delayed spiking patterns (left branch); and another branch containing regular and accelerating traces (right branch) (n=50). B) Representative traces from each cluster. Below, average instantaneous firing rate over all traces belonging to the same cluster. Middle lines indicate the mean; light outer lines indicate standard deviations. The instantaneous firing rate (in Hz) is normalized to 1. C) Transitions observed between firing patterns before and after conditioning. Each cell is assigned to a single cluster (represented as a box) for both the control and conditioned cases. Arrows indicate transitions between types whenever a cell changed cluster. Self-loops indicate that the firing pattern was retained after conditioning. Numbers indicate percentages of observed transitions, and the number of cells in each category under control conditions is displayed next to each pattern type. Cells tend to transition towards adapting and bursting patterns following conditioning (n = 43). Seven cells were assigned as unclassified.

185 in the most common target states of transitions. For example, 89% of the intrinsic bursting cells  
 186 did not change cluster. This provides further evidence for a predominantly unidirectional change  
 187 of firing patterns in response to conditioning. The 7 cells that could not be consistently classified  
 188 under control conditions were all correctly classified after the stimulation. They showed the same  
 189 transition tendencies: 5 moved into the intrinsic bursting cluster, the other 2 became adapting.

### 190 **A conductance based model explains the transitions between firing patterns**

191 The consistent transition towards adapting and intrinsic bursting behaviors suggests a common  
 192 underlying mechanism for most cell types. Our results showing that phosphorylation inhibition  
 193 blocks firing pattern change after conditioning (Figure 2) support the hypothesis that the prime  
 194 candidate for this mechanism is a change in the profile of active conductances contributing to action  
 195 potential discharge dynamics. We explored this possibility using simulations of action potential  
 196 discharge in a conductance-based single compartment neuron model containing 9 voltage and  
 197 calcium gated ion channels (see Methods). The densities and kinetics of these channels were  
 198 derived from experimental measurements of CA3 pyramidal neurons (Hemond *et al.*, 2008). We  
 199 tuned only their maximum conductances to reproduce the discharge patterns observed in our  
 200 experiments. The allowed ranges of maximum conductances were restricted to those reported in  
 201 the literature (Hemond *et al.*, 2008). In order to explain the experimental transitions, we compared  
 202 the performance of the clustering procedure on the model and the experimental data. In a first step,  
 203 the maximal conductance densities of the model were tuned to match the various experimentally  
 204 observed firing patterns. This tuning was performed manually, and the match to the traces was  
 205 qualitative. The absolute values for the conductances required to match the main experimental

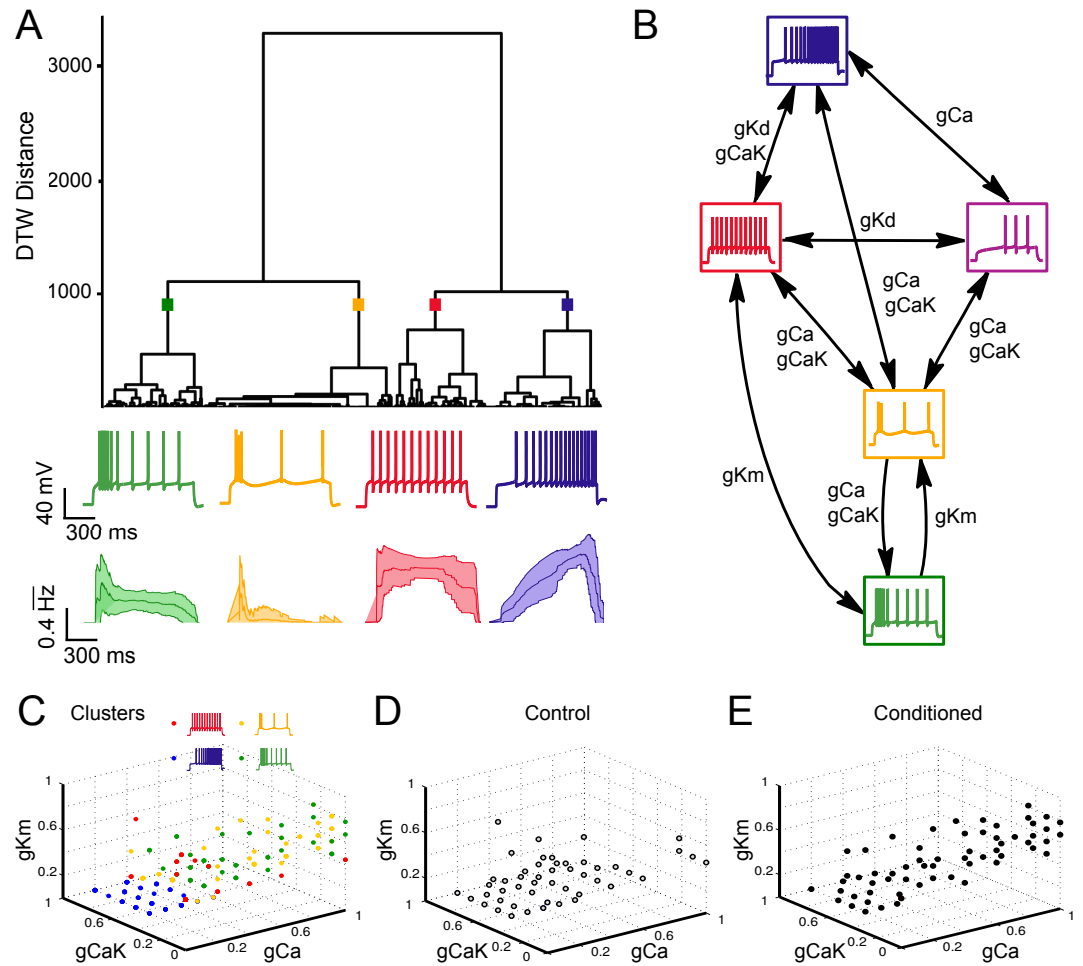

**Figure 4. Hierarchical clustering of the model-generated discharge traces mapped to the experimental traces.** Every experimental trace was matched to a model trace using the DTW algorithm as a search tool on a model database of traces. Hierarchical clustering was then applied to the model traces. A) The clustering algorithm distinguishes four main families, which correspond to adapting, intrinsic burst, non-adapting and accelerating patterns. Below the dendrogram, a representative model trace of every cluster is depicted. The single compartment model could reproduce the sample experimental traces of Figure 3. The exact conductance values used to produce every model pattern and the amount of current injection are shown in the supplementary Table S1. Underneath, average instantaneous firing rate within each cluster with its standard deviation ( $n = 50$ ) B) Conductance road map showing the key conductances responsible for a transition in firing pattern on the model generated traces. The main channels implicated are  $gCa$ ,  $gCaK$ ,  $gKd$  and  $gKm$ . C) Distribution of the conductance vectors of the model traces clustered in (A) in 3D space. Axes correspond to: calcium conductance variable ( $gCa$ ); calcium-dependent potassium channel ( $gCaK$ ); and potassium channel ( $gKm$ ). The dots are color coded according to their cluster assignment. D) Distribution of the conductance vectors in 3D space of the model traces matched to cells in control conditions E) Distribution of the conductance vectors of traces matched to cells after conditioning. Conditioned cells present a higher content of  $gCa$  and  $gKm$ .



206 categories (Figure 3: adapting, intrinsic burst, delay spiking, accelerating and non-adapting) are  
207 reported in supplementary Table S1. We also were able to reproduce the experimental traces in the  
208 morphologically realistic model described by *Hemond et al. (2008)* (see supplementary Figure S5).  
209 Although the maximal conductance values had to be adjusted to satisfy the different impedance  
210 of the more detailed morphology, the same key channels are responsible for each category of  
211 firings both the single compartment and in the realistic CA3 model. In a second step, a database of  
212 representative ranges of conductances that could plausibly explain the discharge patterns observed  
213 experimentally was generated using the single compartment model. To do this, the maximal  
214 conductances of the different channels were swept through ranges that would likely encompass  
215 the experimentally observed patterns (see supplementary Table S2 for the exact ranges). In this  
216 way a total of 861 conductance profiles were generated. We obtained the discharge response to  
217 different levels of current injection for each conductance profile, giving a total of 5166 voltage  
218 traces with their associated conductance profiles. Every single experimental trace (coming from  
219 both, control and conditioned cases) was matched against the collection of traces in the model  
220 database using the DTW algorithm. The best fit was then selected, allowing us to obtain an estimate  
221 of the conductance profile likely to be present in the experimental neuron. These estimates also  
222 define the subset of model traces that best represent their experimental counterparts. This subset  
223 was then fed to the same hierarchical clustering procedure that was previously performed for the  
224 experimental data (Figure 3). The result of hierarchical clustering of the model traces is shown in  
225 Figure 4A. There are four main families, corresponding to adapting, intrinsic bursting, accelerating  
226 and non-accommodating behavior. The classification of the model traces is very similar to the  
227 experimental one. We noted however the absence of the small class of delayed-spiking patterns  
228 (second cluster of Figure 3), which in the case of the model were allocated mostly to the accelerating  
229 cluster. The transition diagram of Figure 4B represent the crucial conductances determining the  
230 transitions between discharge patterns, obtained during the first step of manual tuning. These  
231 are *gKm*, *gCaK*, *gCa* and *gKd*. In this manner, for the delayed discharge pattern, the presence of  
232 *gKd* is required for a delayed onset of the spiking, and the slow inactivation of *gKd* is important  
233 for generating the accelerating discharge pattern. In the case of the adapting and intrinsic burst  
234 patterns, the inclusion of *gKm* and *gCa* (given the presence of basal levels of *gCaK*) is necessary  
235 for the slowing down of the action potentials after the initial discharge. In panel 4C each point  
236 indicates the location of an experimental discharge response matched to the model in conductance  
237 space. The color of a point shows its cluster assignment. There is a systematic segregation of the  
238 data, indicating how the discharge classes of Figure 4A conform to localized regions of conductance  
239 space. This correspondence of firing patterns and biophysical parameters offers an interpretation  
240 of the causes of transitions between firing behaviors induced by mossy fiber stimulation (Figure 3C).  
241 The shift towards adapting and intrinsic bursting behavior after the conditioning corresponds to an  
242 increase in calcium related, and *gKm* conductances (Figure 4D,E).

## 243 Discussion

244 We have shown that the characteristic firing patterns of neurons in the CA3 region of the hip-  
245 pocampus can be modified by subthreshold stimulation of the soma. The effect was elicited either  
246 indirectly by stimulation of the mossy fibers, or directly by somatic current injection. The change  
247 was present immediately after the 8 minute conditioning protocol, suggesting that the mecha-  
248 nism underlying the transition operates on a timescale of at most, a few minutes. The effect was  
249 abolished under the presence of PKA and PKC inhibitors, indicating that phosphorylation of conduc-  
250 tance channels over the duration of the conditioning is necessary for the firing pattern changes.  
251 Hierarchical cluster analysis showed that the transitions observed are more likely towards adapting  
252 and intrinsic burst responses. We were able to reproduce the experimentally observed changes in  
253 firing in simulations of a conductance-based model of neuron electrophysiology. We found that  
254 the shift in responses towards adapting and intrinsic burst can be explained by recruitment of  
255 calcium and M-type potassium conductances. These results indicate that suprathreshold discharge

256 behavior of neurons on the time scale of seconds can be modified by the statistics of ongoing  
257 subthreshold activity on a much longer time scale.

### 258 **Previously reported changes in firing pattern**

259 Activity dependent changes on the intrinsic firing properties of neurons have been reported ex-  
260 tensively, although the attention has been restricted primarily to the modulation of firing rates for  
261 homeostatic plasticity (*Desai et al., 1999; Abbott and Nelson, 2000; Turrigiano and Nelson, 2004;*  
262 *Fan et al., 2005*). Regarding the dynamics of the discharge, plasticity has been reported in lobster,  
263 with activity isolation being a crucial component in shaping the patterns (*Turrigiano et al., 1994*).  
264 Modulation of the delay spiking pattern in the hippocampus (*Cudmore et al., 2010; Hyun et al.,*  
265 *2013*) and in the cortex (*Dehorter et al., 2015*) have been shown to be induced by network activity or  
266 conditioning pulses. Induction of the burst pattern after status epilepticus has also been reported  
267 in hippocampus (*Su et al., 2002*) while *Thompson et al. (1996)* have shown reductions in post-burst  
268 AHP and accommodation in CA3 neurons after eye-blink conditioning. These studies favor the  
269 hypothesis that is the current network status of CA3 the responsible of shaping the discharge  
270 pattern of neurons in this region. In this manner, the firing pattern transitions that we observe are  
271 likely to be elicited when disturbing the basal activity that the neurons were receiving on the CA3  
272 network.

273 This study was performed on organotypic cultures, derived from brain slices of newborn rats  
274 that are incubated for three weeks using the roller-tube technique (*Gähwiler, 1981*). Organotypic  
275 cultures have been used extensively to characterize electrophysiological properties of hippocampal  
276 neurons and it is know that the tissue preserves the anatomical organization of the adult hippocam-  
277 pus, as well as its connectivity and characteristic spontaneous activity (*Gähwiler, 1988; Okamoto*  
278 *et al., 2014*). Most of the studies cited in this chapter were done in cultures or juvenile acute brain  
279 slices, indicating that the plasticity of the patterns is not unique to the organotypic preparation. It  
280 would be interesting to know however whether this type of plasticity is also prominent in the adult  
281 brain and if it also happens, at the same time scale, in other brain areas such as the cerebral cortex.

### 282 **Modulation of cell excitability via conductance changes**

283 Activity dependent changes of conductance have been extensively studied, and shown to be trig-  
284 gered even by learning paradigms (*Thompson et al., 1996; Zhang and Linden, 2003; McKay et al.,*  
285 *2013*). The work of *Turrigiano et al. (1994)* suggested that a calcium dependent mechanism could  
286 modulate the neural conductances in STG lobster neurons, and that this would translate into  
287 changes in the cells' firing patterns. Later work showed that depolarizing pulses at 1Hz could alter  
288 the density of the calcium-dependent outward current *ICaK* and the transient outward current  
289 *IA* in the STG (*Golowasch et al., 1999*). These studies led to theories of homeostatic plasticity  
290 (*Abbott and Nelson, 2000; Turrigiano and Nelson, 2004*), which propose that cells maintain both  
291 the turnover of ion channels, and a stable level of activity, to compensate for changes in synaptic  
292 strength. However the time scale of such mechanisms typically extends over hours, and presuma-  
293 bly involves processes of gene expression (*Lee et al., 2005*), whereas in our experiments the  
294 changes were observed immediately after conditioning. *Aizenman and Linden (2000)* observed  
295 rapid changes of excitability of cerebellar cells after synaptic stimulation, and proposed a calcium-  
296 dependent modification though phosphorylation of *gCaT* and *gCaK* to account for the observed  
297 changes. Interestingly, these are the same candidate channels that we have identified as underlying  
298 the discharge pattern changes in this study. Supporting these lines, rapid up- or down-regulation  
299 of ion channel conductance via phosphorylation or vesicle modulation due to calcium signaling  
300 has been extendedly demonstrated (*Flavell and Greenberg, 2008; Davis et al., 2001; Zhang and*  
301 *Linden, 2003*) and it has been shown that ion channels possess a complex of scaffold proteins  
302 containing certain protein kinases that could selectively regulate channel conductance through  
303 phosphorylation (*Davis et al., 2001*). This mechanism could provide a link between the activity of the  
304 network and the specific conductance recruitment. An alternative explanation to the conductance

305 recruitment is that continuous stimulation of the neuron may alter the ion concentrations in the  
306 cellular environment; for example, by altering intracellular potassium and calcium concentrations  
307 (*Jensen et al., 1994; Su et al., 2001*). However, our simulations show that the decay time constant  
308 of the intracellular calcium is too short to allow significant accumulation over the period of con-  
309 ditioning (see supplementary Figure S6A-C). Even if the time constant were greatly increased, the  
310 accumulation of calcium during conditioning would be insufficient to elicit a significant change in  
311 firing pattern (see supplementary Figure S6D). Regarding potassium, our extracellular concentration  
312 was less than that required (*Jensen et al., 1994*) for the changes in pattern that we observe. On  
313 the other hand, the abolition of the effect by the inhibition of phosphorylation points towards an  
314 induction of a biochemical pathway as the cause of the conductance increase.

### 315 **Candidate conductances for the firing pattern transitions**

316 Our model suggests that the likely candidates for eliciting any type of transitions through the firing  
317 pattern space of CA3 cells are  $gKd$ ,  $gKm$  and  $gCa$  coupled with  $gCaK$ . We are aware that alternative  
318 channels could elicit a similar dynamical response. The effect on the spike delay mediated by a slow  
319 inactivating hyperpolarizing current, such as  $gKd$  can also be elicited by a slow non-inactivating  
320 depolarizing current such as  $gNap$ . Thus, it is possible that different cells recruit different set of  
321 conductances depending on their initial conductance profile. However, the candidates we propose  
322 have been previously reported to shape the spiking response of the cell via activity dependent  
323 mechanisms. For example, it is well established in the epilepsy literature that  $gCaT$  is strongly  
324 associated with the switch to bursting mode in hippocampal cells (*Kim et al., 2001; Su et al., 2002*)  
325 while  $gKd$  in the hippocampus and similar potassium conductances in the cortex have been shown  
326 to be up- or down-regulated according to network activity and modulate the delay response of  
327 the cell (*Cudmore et al., 2010; Hyun et al., 2013; Dehorter et al., 2015*). Modulation of the M-type  
328 current upon activity has also been shown in the Dentate Gyrus (*Zhang and Shapiro, 2012*) and  
329 in CA3 (*Sánchez-Aguilera et al., 2014*), with the latter group reporting that transient depolarizing  
330 pulses are more effective in the modulation of the current.

331 The conditioning protocol elicited stereotypic transitions of pattern towards adapting or intrinsic  
332 burst patterns. However, it was not equally likely for all cell types to perform such transitions.  
333 For example, accelerating cells moved towards regular patterns with higher probability than the  
334 rest of patterns (Figure 3C). We speculate that either the initial density of channels favors the  
335 different likelihood of transitions, or that a cell on such initial state must necessarily become  
336 regular during the transition to any other pattern. An alternative is that there may be some cell  
337 types that obey distinct rules. For example, we noticed that 4 cells from the non-adapting cluster  
338 had high firing rates under control conditions (see supplementary Figure S7). Two of these had  
339 smooth cell morphologies. The other two cells correspond to very densely spiny cells, with stellate  
340 morphologies. Interestingly, although transitions towards bursting or classic adapting behaviors  
341 were not observed on these cells, there was a modulation on the delay of the first spike in both cell  
342 types, suggesting that the stimulation protocol had a differential effect on this particular neural  
343 population. One of the typical transitions that we observe in our dataset is the switch of cells  
344 towards bursting behaviors. We emphasize that this is not the only transition that is induced, but  
345 special attention should be given to the burst mechanism. It is known from the literature that  
346 different types of cells can present this dual behavior. For example, relay cells on the thalamus  
347 become bursty upon hyperpolarization because of T-type conductance inactivation (*Sherman, 2001*).  
348 In our case, after the induction protocol, the cells depolarized 5 mV in average, so we rule out  
349 this hyperpolarization mechanism. The main form of discharge of CA3 cells have been known to  
350 be either regular or bursting (*Hemond et al., 2008*). Although the firing pattern transitions were  
351 abolished in the presence of PKA and PKC inhibitors, 2 cells out of 13 showed still transitions to  
352 intrinsic burst. This could be likely due to failure of diffusion of inhibitors from the electrode, but  
353 we cannot exclude a different mechanism for this type of transition (for example, through different  
354 kinase pathways).

## 355 **Functional implications of firing pattern modulation**

356 The fact that neurons possess the internal machinery to mediate the observed transitions raises  
357 questions about the computational consequences of such behavior. As proposed by *Shin et al.*  
358 (1999), a neuron that can dynamically adapt its output firing in response to its input statistics would  
359 have important advantages. If such neuron could adjust its threshold and dynamic range upon  
360 activity, it could respond to stimuli over a broad range of amplitudes and frequencies without  
361 compromising the sensitivity and dynamic range of the cell. Spike frequency accommodation  
362 has the characteristics of a high-pass filter (*Benda and Herz, 2003*). Since our conditioning stimuli  
363 occurred at constant frequencies, the cells may have recruited a specific set of conductances that  
364 shift their integration properties so as to gain sensitivity in the new spectrum range. Differences  
365 in filtering properties of brain stem neurons have also been shown to facilitate the extraction of  
366 spatial information from natural sounds (*Remme et al., 2014*) and most of the conductances that  
367 we identify in this study have been shown to be frequency resonance candidates (*Hutcheon and*  
368 *Yarom, 2000; Hu et al., 2002; Schreiber et al., 2004*). These resonance properties of cells may have  
369 important functional implications for neural activity and brain rhythms (*Llinás, 1988; Buzsáki and*  
370 *Draguhn, 2004*). In addition, modeling studies have shown that a neuron able to adapt to its own  
371 input statistics is able to maximize the mutual information between its input and output firing rates  
372 (*Stemmler and Koch, 1999*). This type of effect can emerge following firing rate homeostasis rules  
373 and promote metaplasticity (*Honnuraiah and Narayanan, 2013*); on the other hand it can be their  
374 cause (*Joshi and Triesch, 2009*). Finally, this fast adaptability of the firings may also be important for  
375 specific memory acquisition on the hippocampus (*Thompson et al., 1996; Benna and Fusi, 2016*).  
376 Further studies will be needed in order to unravel the role that such firing pattern transitions may  
377 have for computations in neural circuits. A first step towards this goal must be to explore more  
378 generally how the form and frequency spectrum of somatic input signals on the long time scale  
379 affect the distinct firing patterns that neurons exhibit on the short scale.

## 380 **Conclusion**

381 We have shown that hippocampal neurons in rat organotypic cultures can rapidly adapt their  
382 suprathreshold action potential discharge patterns in response to subthreshold paired pulse con-  
383 ditioning stimuli delivered to their somata either by activation of their synapses, or directly by  
384 intrasomatic current injection. We propose that these changes are mediated via phosphorylation  
385 by recruitment of calcium and M-type potassium conductances, conditional on the statistics of their  
386 somatic input currents. Such a mechanism would allow the neuron to adapt its output behavior to  
387 the requirements of the network in which it is embedded. Our results also imply that the discharge  
388 characteristics of neurons in this hippocampal region are not constant and may not provide a  
389 reliable descriptor of a neural phenotype.

## 390 **Methods and Materials**

391 All experiments were conducted in accordance with guidelines and regulations of the cantonal  
392 veterinary office of Zurich; License Nr 81-2014.

## 393 **Electrophysiological Recordings**

394 Rat hippocampal organotypic cultures (*Gähwiler, 1981*) of average postnatal age 21 days were  
395 transferred to a recording chamber and mounted on an upright microscope (Axioskop FS1; Zeiss).  
396 The cultures were superfused with an external solution ( $pH 7.4$ ) containing (in  $mM$ ) 148.8  $Na^+$ , 2.7  
397  $K^+$ , 149.2  $Cl^-$ , 2.8  $Ca^{2+}$ , 2.0  $Mg^{2+}$ , 11.6  $HCO_3^-$ , 0.4  $H_2PO_4^-$ , 5.6 D-glucose, and 10  $mg/l$  Phenol Red.  
398 All experiments were performed at 34 °C. Whole-cell recordings of CA3 neurons were obtained with  
399 patch pipettes (4-7  $M\Omega$ ). Pipettes were filled (in  $mM$ ) with 126 Kgluconate, 4  $NaCl$ , 1  $MgSO_4$ , 0.1  
400 *BAPTA-free*, 0.05 *BAPTA-Ca^{2+}*, 15 glucose, 3 *ATP*, 5 *HEPES* ( $pH$  was adjusted to 7.2 with  
401 *KOH*) 0.1 *GTP*, and 10.4 byocitin. IPSPs in the recorded cells were reduced by adding picrotoxin (1  
402  $mM$ ) to the intracellular patch solution in order to elicit reliable depolarization in the cell.

403 The recording pipettes were manually positioned under microscope control. Recorded neurons  
404 were located mostly in the pyramidal cell layer. Electrophysiology and subsequent histology in a  
405 subset of the cells recorded suggest that the neurons described below include both pyramidal cells  
406 and smooth cells.

407 Current-voltage relationships were determined by step command potentials and had duration  
408 of 1 s to ensure steady-state responses. Data were recorded using an Axopatch 200B amplifier  
409 (Molecular Devices). Series resistance was monitored regularly, and was typically between 5 and 15  
410  $M\Omega$ . Cells were excluded from further analysis if this value changed by more than 20% during the  
411 recording. Junction potential and bridge was not corrected.

412 Mossy fibers were stimulated with a bipolar tungsten electrode. The intensity of the stimulus  
413 was adjusted to evoke subthreshold post-synaptic potential responses of 15 mV on average in the  
414 recorded neuron (minimal stimulation + 20% stimulation intensity).

415 Action potential discharges were evoked by injected current steps (-0.08 up to 1.8 nA; step  
416 increment 0.05 - 0.15 nA, depending on the input resistance of the recorded cell) each lasting 5  
417 seconds. After this control, the neurons were conditioned by mossy fibers activation, consisting  
418 of a double pulse (0.1 ms duration pulses, interval 10 - 20 ms) at a frequency of 1 Hz, repeated  
419 500 times. Thus, the conditioning period was approximately 8 minutes. Immediately after this  
420 conditioning, the firing pattern of the neuron was assessed again using the same step protocol.  
421 The step protocols were repeated 3 times with 5 min intervals to assess stability. In a subset of  
422 experiments, mossy fiber subthreshold responses were mimicked by injecting somatically and at a  
423 frequency of 1 Hz double step current pulses of 50ms of duration and 20ms of interstep interval.  
424 The amplitude of the pulse was adjusted in order to get a depolarization of 15 mV on average.

## 425 **Histology**

426 Hippocampal slice cultures were prepared for morphological assessment by fixing in freshly pre-  
427 pared 4% paraformaldehyde in 0.1 M phosphate buffer (PB) at pH 7.4 overnight at 4 °C; washing  
428 three times in phosphate-buffered saline (PBS, 1.5 mM  $KH_2PO_4$ , 8.5 mM  $Na_2HPO_4$ , 137 mM NaCl,  
429 and 3 mM KCl, pH 7.4); and permeabilizing at room temperature in PBS that contained 10%  
430 heat-inactivated donkey serum, and 1% Triton X-100. Then they were incubated overnight at 4 °C  
431 with streptavidin conjugated with Alexa (546λ). The cultures were washed again three times in  
432 PBS, and then mounted in Fluorostab (Bio-Science Products AG, Emmenbrucke, Switzerland) and  
433 coverslipped. High-resolution images were obtained using laser scanning confocal microscopy  
434 (Leica TCS SP2, Leica Microsystems, Heidelberg, Germany).

## 435 **Data analysis**

436 Signals were digitized at 4 kHz for current clamp and 5 kHz for voltage clamp. These data were  
437 analyzed off-line using pCLAMP 10 (Molecular Devices) and MatlabR2011b (MathWorks). Analysis  
438 of the voltage traces was performed similar to Chen et al. (2015). The average resting membrane  
439 potential of each neuron was estimated as the mean membrane potential during the first 100 ms  
440 of current-injection protocol (before injection of the step-current pulses). Input resistance was  
441 obtained by measuring the voltage drop across the hyperpolarizing trace of the step-current pulses.  
442 APs were located using median filtering, and the threshold was inferred as the point at which the  
443 derivative of the voltage trace exceeded 5 mV/ms. AP amplitude was measured from threshold-to-  
444 peak and AP afterhyperpolarization (AHP) from the threshold-to through. Half-width was estimated  
445 as the full width at half-maximal amplitude. Statistical comparisons between conditions were  
446 performed using either a t-test or a two-sided Wilcoxon signed rank test, after checking the data for  
447 normality using a one-sample Kolmogorov-Smirnov test.

## 448 **Cluster analysis of discharge traces**

449 The firing patterns of the neurons were categorized by hierarchical clustering of their discharge  
450 patterns. The dataset consisted of all voltage traces recorded from neurons in response to step-wise

451 current injections with different amplitudes, including recordings before and after conditioning. For  
452 any one neuron, the collection of responses to different current injections represents the signature  
453 of the electrical type. However, for inherent verification of our cluster procedure, we chose to treat  
454 each response independently. In this way successful clustering could be confirmed by its ability to  
455 assign responses from the same neuron into the same category.

456 The clustering measured similarity of a feature vector derived from the voltage traces. First  
457 the recorded voltage traces were converted into a time series of the instantaneous firing rates.  
458 The instantaneous firing rate at each spike was taken as  $1/\text{Inter-spike-Interval (ISI)}$ . Then the  
459 instantaneous rates were linearly interpolated across the spike times at 1 ms time intervals over  
460 6 seconds (5 second current injection step, plus 1 second on and offset), and normalized by the  
461 maximum firing rate. Finally, a characteristic feature vector of a common length of 600 elements  
462 was obtained by down-sampling the interpolated rate traces by a factor of 10, in order to make  
463 them computationally tractable to the similarity measurement.

464 Similarity distances between pairs of traces were calculated using the Dynamic Time Warping  
465 (DTW) metric (*Berndt and Clifford, 1994*). DTW takes into account that two similar signals can be  
466 out of phase temporarily, and aligns them in a non-linear manner through dynamic programming  
467 (*Keogh and Ratanamahatana, 2005*). The algorithm takes two time series  $Q = \langle q_1, q_2, \dots, q_n \rangle$  and  
468  $C = \langle c_1, c_2, \dots, c_m \rangle$  and computes the best match between the sequences by finding the path of  
469 indices that minimizes the total cumulative distance

$$\text{DTW}(Q, C) = \min \sum_{k=1}^K w_k \quad (1)$$

470 where  $w_k$  is the cost of alignment associated with the  $k^{\text{th}}$  element of a warping path  $W$ . A  
471 warping path starts at  $q_1$  and  $c_1$  respectively, and finds a monotonically increasing sequence of  
472 indices  $i^k$  and  $j^k$ , such that all elements  $q_i$  in  $Q$  and  $c_j$  in  $C$  are visited at least once, and for the  
473 final step of the path  $i^{\text{end}} = n$  and  $j^{\text{end}} = m$  holds. The optimal DTW distance is the cumulative  
474 distances  $y(i, j)$ , corresponding to the costs of the optimal warping path  $\langle q_1, \dots, q_i \rangle$  and  $\langle c_1, \dots, c_j \rangle$ .  
475 This distance can be computed iteratively by dynamic programming:

$$y(i, j) = d(q_i, c_j) + \min\{y(i-1, j-1), y(i-1, j), y(i, j-1)\} \quad (2)$$

476 where  $d(q_i, c_j)$  is the absolute difference between the elements of the sequence. The optimal  
477 warping path is obtained by backtracking from the final element  $y(n, m)$ , and finding which of the  
478 three options (increasing  $i$  only, increasing  $j$  only, or increasing  $i$  and  $j$  simultaneously) led to the  
479 optimal warping distance, until  $i = 1, j = 1$  is reached. A warping window constraint of 10% of the  
480 vector size was chosen (*Keogh and Ratanamahatana, 2005*).

481 The pairwise DTW distances were used to perform hierarchical clustering by Ward's algorithm  
482 (*Ward Jr, 1963*). The number of classes increases with the level of the hierarchy. We choose to cut  
483 the tree at a level that provided sufficient structure to interpret the hierarchy in terms of recognized  
484 response types (for example, *Ascoli et al. (2008)*).

485 Every recording for a given cell was treated as an independent observation, and could in  
486 principle be assigned to any cluster. If the electrophysiological state of the cell is expressed in all of  
487 its responses, then we expect that all the independent observations derived from that cell should  
488 be assigned to the same cluster. However, traces derived from current injections to the same cell in  
489 different conditions (pre- or post-stimulation) are expected to be assigned to different clusters if  
490 there is significant change in the underlying electrophysiological state.

491 In fact the independent traces did not cluster perfectly. Instead, the majority of independent  
492 observations derived from a given state clustered together and there were a few that fell into other  
493 clusters. Therefore, we chose to label the electrical type of each cell according to the cluster that  
494 contained the mode of the traces for one set of current injections. Cells for which no clear dominant  
495 cluster could be identified, e.g. because half of the traces fell into one cluster, and half of them into

496 another, were labeled as unclassified. A cluster transition was recognized whenever the cell was  
497 assigned to different clusters before and after the stimulation protocol.

498 The analysis was performed using custom-written software in MatlabR2011b. The implementa-  
499 tion of the DTW algorithm was obtained from Matlab Central (<http://www.mathworks.com/matlabcentral/fileexchange/dynamic-time-warping-dtw>).  
500

### 501 Neuron simulation model

502 A single cylindrical compartment, conductance-based neuronal model was used for all simulations.  
503 The length and diameter of the cylinder are set at equal dimensions to avoid spatial discretization  
504 problems in a single compartment (Cooley and Dodge, 1966; De Schutter and Bower, 1994). The  
505 geometrical dimensions and passive properties associated with the model were obtained from  
506 Hemond et al. (2008). We have set the length and diameter of our compartment to 50  $\mu\text{m}$  to obtain  
507 the input resistance of 150 M $\Omega$  in our model cell that approximates the mean input resistance of our  
508 experimental cells (144.8 M $\Omega$ ). The active properties were modeled by including appropriate voltage  
509 and calcium gated ion channels whose density and kinetics were obtained from experimental  
510 recordings performed in CA3 neurons (Hemond et al., 2008). The simulations were performed  
511 using NEURON (Hines and Carnevale, 1997). We choose an integration step of 25  $\mu\text{s}$ , which was  
512 approximately 1% of the shortest time constant in the model. The voltage- and time-dependent  
513 currents followed the Hodgkin and Huxley formalism (1952):

$$C \cdot \frac{dV}{dt} = -(I_{Na} + I_{Kdr} + I_{Kd} + I_{KA} + I_{Km} + I_{CaK} + I_{CaL} + I_{CaT} + I_{CaN} + I_{Leak}) \quad (3)$$

514 Each current  $I_x$  is described by the equation

$$I_{(v,t)} = \bar{g} \cdot m \cdot h \cdot (V_{(t)} - E) \quad (4)$$

515 where  $\bar{g}$  is the maximal conductance,  $m$  and  $h$  are activation and inactivation terms,  $V$  is the  
516 membrane potential, and  $E$  the reversal potential of the channel. The reversal potentials for  $Na^+$   
517 and  $K^+$  were  $E_{Na} = 50$  mV and  $E_K = -85$  mV, respectively. The equations describing the different  
518 channel kinetics ( $m, h$ ) for every current were obtained from Hemond et al. (2008). Following this  
519 reference, the three calcium conductances (T, M and L) were incorporated into a single parameter  
520  $g_{Ca}$ .

521 The set of maximal conductance values that are consistent with all our experimentally observed  
522 firing patterns are shown in the supplementary Figure S1. The intracellular calcium dynamics were  
523 modeled (Hemond et al., 2008), as follows:

524

$$\frac{d[Ca^{2+}]_i}{dt} = \frac{I_{Ca}}{2Fv} - \frac{[Ca^{2+}]_i - 0.0001}{\tau_{Ca}} \quad (5)$$

525 The first term of the above equation describes the change caused by  $Ca^{2+}$  influx into a com-  
526 partment with volume  $v$ .  $F$  is the Faraday constant,  $I_{Ca}$  is the calcium current and  $\tau_{Ca}$  is the time  
527 constant of  $Ca^{2+}$  diffusion.

528 The occasional decrease in spike amplitude seen in some of the experimental traces is probably  
529 due to sodium inactivation. We choose not to include this feature in the model, because it does not  
530 affect the overall dynamics of the spike discharge itself.

### 531 Acknowledgments

532 We thank Kevan Martin for critical comments on the manuscript, Beat Gähwiler for useful discus-  
533 sions, and Gabriela Michel and Marion Betizeau for proofreading the manuscript. This work was  
534 supported by EU SECO Grant EU216593 and ETH Grant 2-73246-8 to Kevan A. C. Martin and Swiss  
535 National Science Foundation grant 31003A-143373 / 1 to U.G.

## 536 **Competing Interests**

537 All authors declare that they have no competing interests.

## 538 **References**

- 539 **Abbott LF**, Nelson SB. Synaptic plasticity: taming the beast. *Nature neuroscience*. 2000; 3:1178–1183.
- 540 **Aizenman CD**, Linden DJ. Rapid, synaptically driven increases in the intrinsic excitability of cerebellar deep  
541 nuclear neurons. *Nature neuroscience*. 2000; 3(2):109–111.
- 542 **Ascoli GA**, Alonso-Nanclares L, Anderson SA, Barrionuevo G, Benavides-Piccione R, Burkhalter A, Buzsáki G,  
543 Cauli B, DeFelipe J, Fairén A, et al. Petilla terminology: nomenclature of features of GABAergic interneurons of  
544 the cerebral cortex. *Nature Reviews Neuroscience*. 2008; 9(7):557–568.
- 545 **Benda J**, Herz AV. A universal model for spike-frequency adaptation. *Neural computation*. 2003; 15(11):2523–  
546 2564.
- 547 **Benna MK**, Fusi S. Computational principles of synaptic memory consolidation. *Nature neuroscience*. 2016; .
- 548 **Berndt DJ**, Clifford J. Using Dynamic Time Warping to Find Patterns in Time Series. In: *KDD workshop*, vol. 10  
549 Seattle, WA; 1994. p. 359–370.
- 550 **Brandalise F**, Carta S, Helmchen F, Lisman J, Gerber U. Dendritic NMDA spikes are necessary for timing-  
551 dependent associative LTP in CA3 pyramidal cells. *Nature Communications*. 2016; 7:13480.
- 552 **Brandalise F**, Gerber U. Mossy fiber-evoked subthreshold responses induce timing-dependent plasticity at  
553 hippocampal CA3 recurrent synapses. *Proceedings of the National Academy of Sciences*. 2014; 111(11):4303–  
554 4308.
- 555 **Brown JT**, Randall AD. Activity-dependent depression of the spike after-depolarization generates long-lasting  
556 intrinsic plasticity in hippocampal CA3 pyramidal neurons. *The Journal of physiology*. 2009; 587(6):1265–1281.
- 557 **Butt SJ**, Fuccillo M, Nery S, Noctor S, Kriegstein A, Corbin JG, Fishell G. The temporal and spatial origins of  
558 cortical interneurons predict their physiological subtype. *Neuron*. 2005; 48(4):591–604.
- 559 **Buzsáki G**, Draguhn A. Neuronal oscillations in cortical networks. *Science*. 2004; 304(5679):1926–1929.
- 560 **Ramon y Cajal D**. Nuevo concepto de la histología de los centros nerviosos. . 1893; .
- 561 **Cauli B**, Porter JT, Tsuzuki K, Lambolez B, Rossier J, Quenet B, Audinat E. Classification of fusiform neocortical  
562 interneurons based on unsupervised clustering. *Proceedings of the National Academy of Sciences*. 2000;  
563 97(11):6144–6149.
- 564 **Chen IW**, Helmchen F, Lütcke H. Specific early and late oddball-evoked responses in excitatory and inhibitory  
565 neurons of mouse auditory cortex. *Journal of Neuroscience*. 2015; 35(36):12560–12573.
- 566 **Cohen S**, Greenberg ME. Communication between the synapse and the nucleus in neuronal development,  
567 plasticity, and disease. *Annual review of cell and developmental biology*. 2008; 24:183–209.
- 568 **Connors BW**, Gutnick MJ. Intrinsic firing patterns of diverse neocortical neurons. *Trends in neurosciences*. 1990;  
569 13(3):99–104.
- 570 **Cooley J**, Dodge F. Digital computer solutions for excitation and propagation of the nerve impulse. *Biophysical*  
571 *journal*. 1966; 6(5):583–599.
- 572 **Cudmore RH**, Fronzaroli-Molinieres L, Giraud P, Debanne D. Spike-time precision and network synchrony are  
573 controlled by the homeostatic regulation of the D-type potassium current. *Journal of Neuroscience*. 2010;  
574 30(38):12885–12895.
- 575 **Davis MJ**, Wu X, Nurkiewicz TR, Kawasaki J, Gui P, Hill MA, Wilson E. Regulation of ion channels by protein tyrosine  
576 phosphorylation. *American Journal of Physiology-Heart and Circulatory Physiology*. 2001; 281(5):H1835–  
577 H1862.
- 578 **De Schutter E**, Bower JM. An active membrane model of the cerebellar Purkinje cell. I. Simulation of current  
579 clamps in slice. *Journal of neurophysiology*. 1994; 71(1):375–400.



- 580 **DeFelipe J.** Neocortical neuronal diversity: chemical heterogeneity revealed by colocalization studies of classic  
581 neurotransmitters, neuropeptides, calcium-binding proteins, and cell surface molecules. *Cerebral Cortex*.  
582 1993; 3(4):273–289.
- 583 **Dehorter N,** Ciceri G, Bartolini G, Lim L, del Pino I, Marín O. Tuning of fast-spiking interneuron properties by an  
584 activity-dependent transcriptional switch. *Science*. 2015; 349(6253):1216–1220.
- 585 **Desai NS,** Rutherford LC, Turrigiano GG. Plasticity in the intrinsic excitability of cortical pyramidal neurons.  
586 *Nature neuroscience*. 1999; 2(6):515–520.
- 587 **Druckmann S,** Hill S, Schürmann F, Markram H, Segev I. A hierarchical structure of cortical interneuron electrical  
588 diversity revealed by automated statistical analysis. *Cerebral Cortex*. 2013; 23(12):2994–3006.
- 589 **Dumitriu D,** Cossart R, Huang J, Yuste R. Correlation between axonal morphologies and synaptic input kinetics  
590 of interneurons from mouse visual cortex. *Cerebral cortex*. 2007; 17(1):81–91.
- 591 **Fan Y,** Fricker D, Brager DH, Chen X, Lu HC, Chitwood RA, Johnston D. Activity-dependent decrease of excitability  
592 in rat hippocampal neurons through increases in Ih. *Nature neuroscience*. 2005; 8(11):1542–1551.
- 593 **Flavell SW,** Greenberg ME. Signaling mechanisms linking neuronal activity to gene expression and plasticity of  
594 the nervous system. *Annual review of neuroscience*. 2008; 31:563.
- 595 **Gähwiler B.** Organotypic monolayer cultures of nervous tissue. *Journal of neuroscience methods*. 1981;  
596 4(4):329–342.
- 597 **Gähwiler B.** Organotypic cultures of neural tissue. *Trends in neurosciences*. 1988; 11(11):484–489.
- 598 **García NVDM,** Karayannis T, Fishell G. Neuronal activity is required for the development of specific cortical  
599 interneuron subtypes. *Nature*. 2011; 472(7343):351–355.
- 600 **Golowasch J,** Abbott L, Marder E. Activity-dependent regulation of potassium currents in an identified neuron  
601 of the stomatogastric ganglion of the crab *Cancer borealis*. *Journal of Neuroscience*. 1999; 19:RC33–1.
- 602 **Hemond P,** Epstein D, Boley A, Migliore M, Ascoli GA, Jaffe DB. Distinct classes of pyramidal cells exhibit mutually  
603 exclusive firing patterns in hippocampal area CA3b. *Hippocampus*. 2008; 18(4):411–424.
- 604 **Hille B.** Ion channels of excitable membranes, vol. 507. Sinauer Sunderland, MA; 2001.
- 605 **Hines ML,** Carnevale NT. The NEURON simulation environment. *Neural computation*. 1997; 9(6):1179–1209.
- 606 **Honnuraiah S,** Narayanan R. A calcium-dependent plasticity rule for HCN channels maintains activity home-  
607 ostatic and stable synaptic learning. *PloS one*. 2013; 8(2):e55590.
- 608 **Hosp JA,** Strüber M, Yanagawa Y, Obata K, Vida I, Jonas P, Bartos M. Morpho-physiological criteria divide dentate  
609 gyrus interneurons into classes. *Hippocampus*. 2014; 24(2):189–203.
- 610 **Hu H,** Vervaeke K, Storm JF. Two forms of electrical resonance at theta frequencies, generated by M-current,  
611 h-current and persistent Na<sup>+</sup> current in rat hippocampal pyramidal cells. *The Journal of physiology*. 2002;  
612 545(3):783–805.
- 613 **Hutcheon B,** Yarom Y. Resonance, oscillation and the intrinsic frequency preferences of neurons. *Trends in*  
614 *neurosciences*. 2000; 23(5):216–222.
- 615 **Hyun JH,** Eom K, Lee KH, Ho WK, Lee SH. Activity-dependent downregulation of D-type K<sup>+</sup> channel subunit Kv1.  
616 2 in rat hippocampal CA3 pyramidal neurons. *The Journal of physiology*. 2013; 591(22):5525–5540.
- 617 **Jensen MS,** Azouz R, Yaari Y. Variant firing patterns in rat hippocampal pyramidal cells modulated by extracellular  
618 potassium. *Journal of Neurophysiology*. 1994; 71(3):831–839.
- 619 **Joshi P,** Triesch J. Rules for information maximization in spiking neurons using intrinsic plasticity. In: *Neural*  
620 *Networks, 2009. IJCNN 2009. International Joint Conference on IEEE; 2009*. p. 1456–1461.
- 621 **Kawaguchi Y,** Kubota Y. GABAergic cell subtypes and their synaptic connections in rat frontal cortex. *Cerebral*  
622 *cortex*. 1997; 7(6):476–486.
- 623 **Keogh E,** Ratanamahatana CA. Exact indexing of dynamic time warping. *Knowledge and information systems*.  
624 2005; 7(3):358–386.

- 625 **Kim D**, Song I, Keum S, Lee T, Jeong MJ, Kim SS, McEnery MW, Shin HS. Lack of the burst firing of thalamocortical  
626 relay neurons and resistance to absence seizures in mice lacking  $\alpha$  1G T-type Ca<sup>2+</sup> channels. *Neuron*. 2001;  
627 31(1):35–45.
- 628 **Lee PR**, COHEN JE, BECKER KG, FIELDS RD. Gene Expression in the Conversion of Early-Phase to Late-Phase  
629 Long-Term Potentiation. *Annals of the New York Academy of Sciences*. 2005; 1048(1):259–271.
- 630 **Llinás RR**. The intrinsic electrophysiological properties of mammalian neurons: insights into central nervous  
631 system function. *Science*. 1988; 242(4886):1654–1664.
- 632 **Marder E**, Goaillard JM. Variability, compensation and homeostasis in neuron and network function. *Nature*  
633 *Reviews Neuroscience*. 2006; 7(7):563–574.
- 634 **Markram H**, Toledo-Rodriguez M, Wang Y, Gupta A, Silberberg G, Wu C. Interneurons of the neocortical inhibitory  
635 system. *Nature Reviews Neuroscience*. 2004; 5(10):793–807.
- 636 **McCormick DA**, Connors BW, Lighthall JW, Prince DA. Comparative electrophysiology of pyramidal and sparsely  
637 spiny stellate neurons of the neocortex. *Journal of neurophysiology*. 1985; 54(4):782–806.
- 638 **McKay BM**, Oh MM, Disterhoft JF. Learning increases intrinsic excitability of hippocampal interneurons. *The*  
639 *Journal of Neuroscience*. 2013; 33(13):5499–5506.
- 640 **Moody WJ**, Bosma MM. Ion channel development, spontaneous activity, and activity-dependent development  
641 in nerve and muscle cells. *Physiological reviews*. 2005; 85(3):883–941.
- 642 **Okamoto K**, Ishikawa T, Abe R, Ishikawa D, Kobayashi C, Mizunuma M, Norimoto H, Matsuki N, Ikegaya Y. Ex  
643 vivo cultured neuronal networks emit in vivo-like spontaneous activity. *The Journal of Physiological Sciences*.  
644 2014; 64(6):421–431.
- 645 **Remme MW**, Donato R, Mikiel-Hunter J, Ballesteros JA, Foster S, Rinzel J, McAlpine D. Subthreshold resonance  
646 properties contribute to the efficient coding of auditory spatial cues. *Proceedings of the National Academy of*  
647 *Sciences*. 2014; 111(22):E2339–E2348.
- 648 **Ren J**, Aika Y, Heizmann C, Kosaka T. Quantitative analysis of neurons and glial cells in the rat somatosensory  
649 cortex, with special reference to GABAergic neurons and parvalbumin-containing neurons. *Experimental*  
650 *brain research*. 1992; 92(1):1–14.
- 651 **Sánchez-Aguilera A**, Sánchez-Alonso JL, Vicente-Torres MA, Colino A. A novel short-term plasticity of intrinsic  
652 excitability in the hippocampal ca1 pyramidal cells. *The Journal of physiology*. 2014; p. jphysiol-2014.
- 653 **Schreiber S**, Fellous JM, Tiesinga P, Sejnowski TJ. Influence of ionic conductances on spike timing reliability of  
654 cortical neurons for suprathreshold rhythmic inputs. *Journal of neurophysiology*. 2004; 91(1):194–205.
- 655 **Sherman SM**. Tonic and burst firing: dual modes of thalamocortical relay. *Trends in neurosciences*. 2001;  
656 24(2):122–126.
- 657 **Shin J**, Koch C, Douglas R. Adaptive neural coding dependent on the time-varying statistics of the somatic input  
658 current. *Neural computation*. 1999; 11(8):1893–1913.
- 659 **Somogyi P**, Klausberger T. Defined types of cortical interneurone structure space and spike timing in the  
660 hippocampus. *The Journal of physiology*. 2005; 562(1):9–26.
- 661 **Stemmler M**, Koch C. How voltage-dependent conductances can adapt to maximize the information encoded  
662 by neuronal firing rate. *Nature neuroscience*. 1999; 2(6):521–527.
- 663 **Steriade M**. Neocortical cell classes are flexible entities. *Nature reviews neuroscience*. 2004; 5(2):121–134.
- 664 **Su H**, Alroy G, Kirson ED, Yaari Y. Extracellular calcium modulates persistent sodium current-dependent burst-  
665 firing in hippocampal pyramidal neurons. *The Journal of Neuroscience*. 2001; 21(12):4173–4182.
- 666 **Su H**, Sochivko D, Becker A, Chen J, Jiang Y, Yaari Y, Beck H. Upregulation of a T-type Ca<sup>2+</sup> channel causes a  
667 long-lasting modification of neuronal firing mode after status epilepticus. *The Journal of neuroscience*. 2002;  
668 22(9):3645–3655.
- 669 **Tasic B**, Menon V, Nguyen TN, Kim TK, Jarsky T, Yao Z, Levi B, Gray LT, Sorensen SA, Dolbeare T, et al. Adult mouse  
670 cortical cell taxonomy revealed by single cell transcriptomics. *Nature neuroscience*. 2016; 19(2):335–346.

- 671 **Thompson L**, Moyer J, Disterhoft J. Transient changes in excitability of rabbit CA3 neurons with a time course  
672 appropriate to support memory consolidation. *Journal of Neurophysiology*. 1996; 76(3):1836–1849.
- 673 **Tricoire L**, Pelkey KA, Erkkila BE, Jeffries BW, Yuan X, McBain CJ. A blueprint for the spatiotemporal origins of  
674 mouse hippocampal interneuron diversity. *The Journal of Neuroscience*. 2011; 31(30):10948–10970.
- 675 **Turrigiano G**, Abbott L, Marder E. Activity-dependent changes in the intrinsic properties of cultured neurons.  
676 *Science-AAAS-Weekly Paper Edition-including Guide to Scientific Information*. 1994; 264(5161):974–976.
- 677 **Turrigiano G**, LeMasson G, Marder E. Selective regulation of current densities underlies spontaneous changes  
678 in the activity of cultured neurons. *The Journal of neuroscience*. 1995; 15(5):3640–3652.
- 679 **Turrigiano GG**, Nelson SB. Homeostatic plasticity in the developing nervous system. *Nature Reviews Neuro-*  
680 *science*. 2004; 5(2):97–107.
- 681 **Van Aerde KI**, Feldmeyer D. Morphological and physiological characterization of pyramidal neuron subtypes in  
682 rat medial prefrontal cortex. *Cerebral cortex*. 2015; 25(3):788–805.
- 683 **Ward Jr JH**. Hierarchical grouping to optimize an objective function. *Journal of the American statistical*  
684 *association*. 1963; 58(301):236–244.
- 685 **Zhang J**, Shapiro MS. Activity-dependent transcriptional regulation of M-Type (Kv7) K<sup>+</sup> channels by AKAP79/150-  
686 mediated NFAT actions. *Neuron*. 2012; 76(6):1133–1146.
- 687 **Zhang W**, Linden DJ. The other side of the engram: experience-driven changes in neuronal intrinsic excitability.  
688 *Nature Reviews Neuroscience*. 2003; 4(11):885–900.

| Maximal Conductances | Intrinsic Burst |               |               | Adapting |               |               | Accelerating |               |               | Non-Adapting |               |               | Delayed  |               |               |
|----------------------|-----------------|---------------|---------------|----------|---------------|---------------|--------------|---------------|---------------|--------------|---------------|---------------|----------|---------------|---------------|
|                      | Cylinder        | Realistic CA3 | Realistic CA3 | Cylinder | Realistic CA3 | Realistic CA3 | Cylinder     | Realistic CA3 | Realistic CA3 | Cylinder     | Realistic CA3 | Realistic CA3 | Cylinder | Realistic CA3 | Realistic CA3 |
| $g_{Na}$             | 0.04            | 0.022         | 0.022         | 0.04     | 0.022         | 0.022         | 0.04         | 0.022         | 0.022         | 0.04         | 0.022         | 0.022         | 0.04     | 0.022         | 0.022         |
| $g_{Kdr}$            | 0.01            | 0.01          | 0.01          | 0.01     | 0.01          | 0.02          | 0.01         | 0.02          | 0.02          | 0.01         | 0.01          | 0.01          | 0.02     | 0.01          | 0.01          |
| $g_{Ka}$             | 0.07            | 0.02          | 0.02          | 0.04     | 0.02          | 0.02          | 0.04         | 0.02          | 0.02          | 0.12         | 0.02          | 0.02          | 0.08     | 0.02          | 0.02          |
| $g_{CaT}$            | 0.001           | 0.00002       | 0.00001       | 0.00     | 0.00001       | 0.00001       | 0.0003       | 0.00001       | 0.00001       | 0.00         | 0.00          | 0.00          | 0.0001   | 0.00          | 0.00          |
| $g_{CaN}$            | 0.001           | 0.00002       | 0.00001       | 0.00     | 0.00001       | 0.00001       | 0.0003       | 0.00001       | 0.00001       | 0.00         | 0.00          | 0.00          | 0.0001   | 0.00          | 0.00          |
| $g_{CaL}$            | 0.001           | 0.00002       | 0.00001       | 0.00     | 0.00001       | 0.00001       | 0.0003       | 0.00001       | 0.00001       | 0.00         | 0.00          | 0.00          | 0.0001   | 0.00          | 0.00          |
| $g_{CaK}$            | 0.0001          | 0.00002       | 0.00          | 0.00     | 0.00          | 0.00001       | 0.0005       | 0.00001       | 0.00001       | 0.00         | 0.00          | 0.00          | 0.0006   | 0.00          | 0.00          |
| $g_{Km}$             | 0.0006          | 0.021         | 0.017         | 0.00052  | 0.017         | 0.00          | 0.00         | 0.00          | 0.00          | 0.000003     | 0.00          | 0.000003      | 0.000003 | 0.00          | 0.00          |
| $g_{Kd}$             | 0.00045         | 0.002         | 0.00          | 0.00025  | 0.00          | 0.0008        | 0.0008       | 0.005         | 0.005         | 0.00         | 0.00          | 0.00          | 0.00035  | 0.002         | 0.002         |
| $I$                  | 1               | 1.83          | 0.62          | 1.37     | 1.95          | 1.1           | 0.53         | 0.58          | 0.58          | 0.55         | 0.58          | 0.58          | 0.55     | 0.583         | 0.583         |

**Table S1. Model maximal conductance values for the experimental fits.** List of the absolute conductance values used to reproduce the traces of main Figure 4 (Intrinsic Burst, Adapting, Accelerating, Non-Adapting and Delayed) in the single compartment NEURON model. The same class of firing pattern traces could be also reproduced (second column for each trace) using the realistic CA3 pyramidal neuron model from *Hemond et al. (2008)*. The conductances were tuned manually in order to fit qualitatively the overall dynamics of the voltage experimental traces. The bottom row lists the value of the current (in nA) used to generate every voltage trace. For more detailed description of the model see Methods.

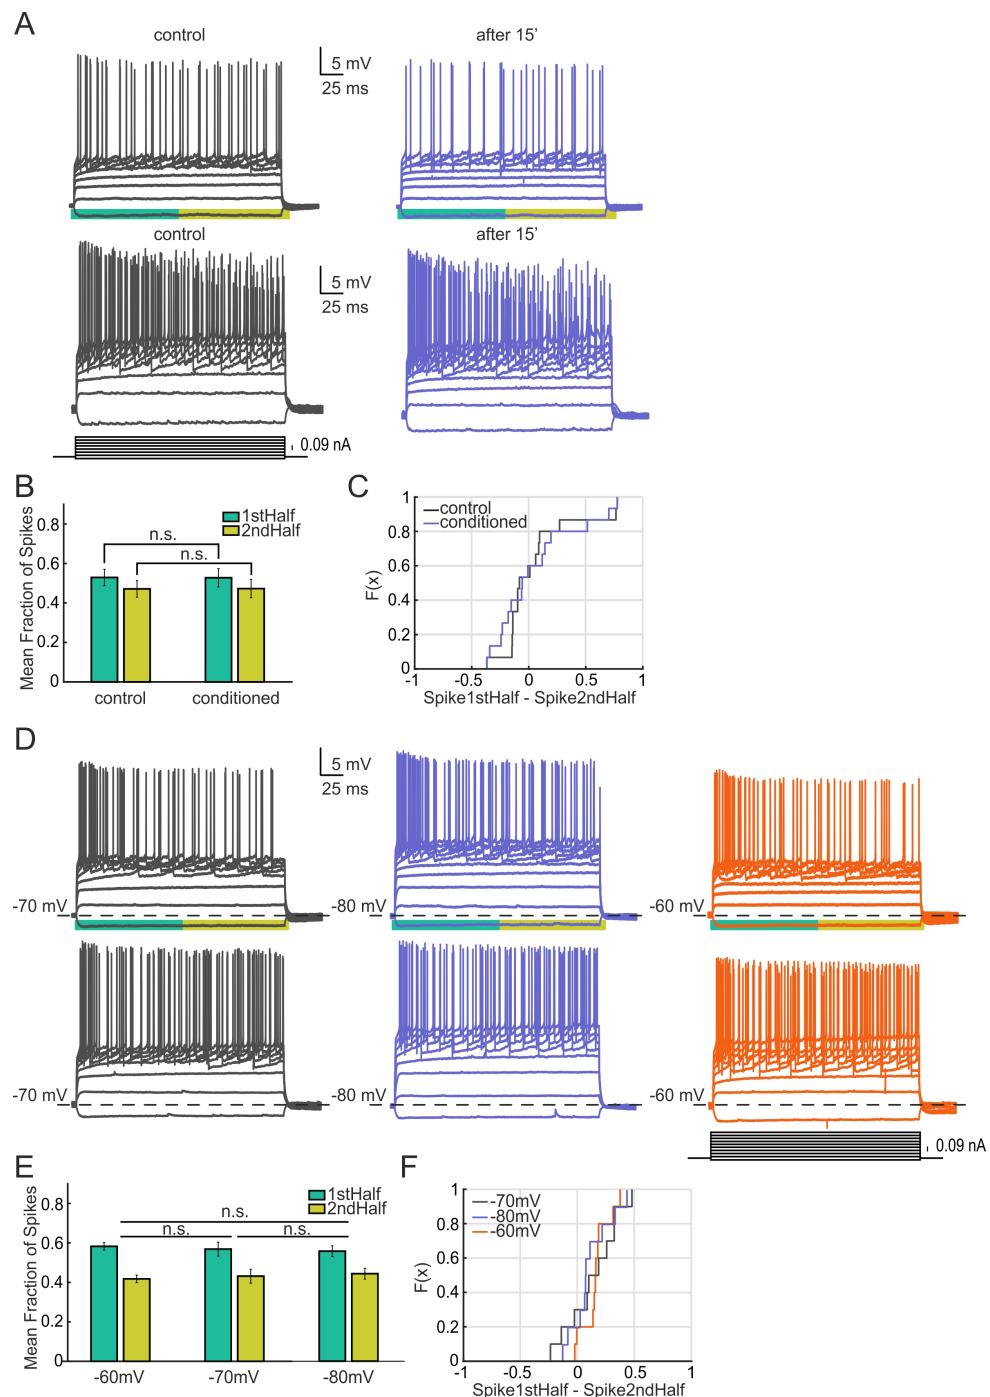

**Figure S1. Stability controls.** Firing pattern transitions are not elicited by step current injection alone. A) Examples of two cells whose firing pattern have been measured by step-wise current injection (protocol showed in the inset). The cells do not show changes in firing pattern after 15 min of recording. B) Mean Fraction of Spikes for the population in the first and second half of the voltage trace for both control and conditioned cases. No significant redistribution on the fraction of spikes is observed ( $n = 15$ ,  $p=0.583$ , two-sided Wilcoxon signed rank test). C) Empirical Cumulative Distribution Function for the data shown in B. Every individual case is represented as the number of spikes for the first half of the trace minus the spikes for the second half. D) Firing pattern transitions are not elicited by sustained shifts in membrane potential. Examples of two cells that have been held at different membrane potentials through steady current injection (-70, -80 and -60 approximately). After changing the holding potential of the recorded neuron the firing pattr was measured by step-wise current injection (protocol showed in the inset). No transitions of firing pattern were observed at any of the different holding potentials. E) Mean Fraction of Spikes for the population in the first and second half of the voltage trace for every condition. No significant redistribution on the fraction of spikes is observed (Vm 60 vs 70,  $p=0.652$ ; Vm 60 vs 80,  $p=0.084$ ; Vm 70 vs 80,  $p=0.695$ ) ( $n = 10$ , two-sided Wilcoxon signed rank test). F) Empirical Cumulative Distribution Function for the data shown in E. Every individual case is represented as the number of spikes for the first half of the trace minus the spikes for the second half.

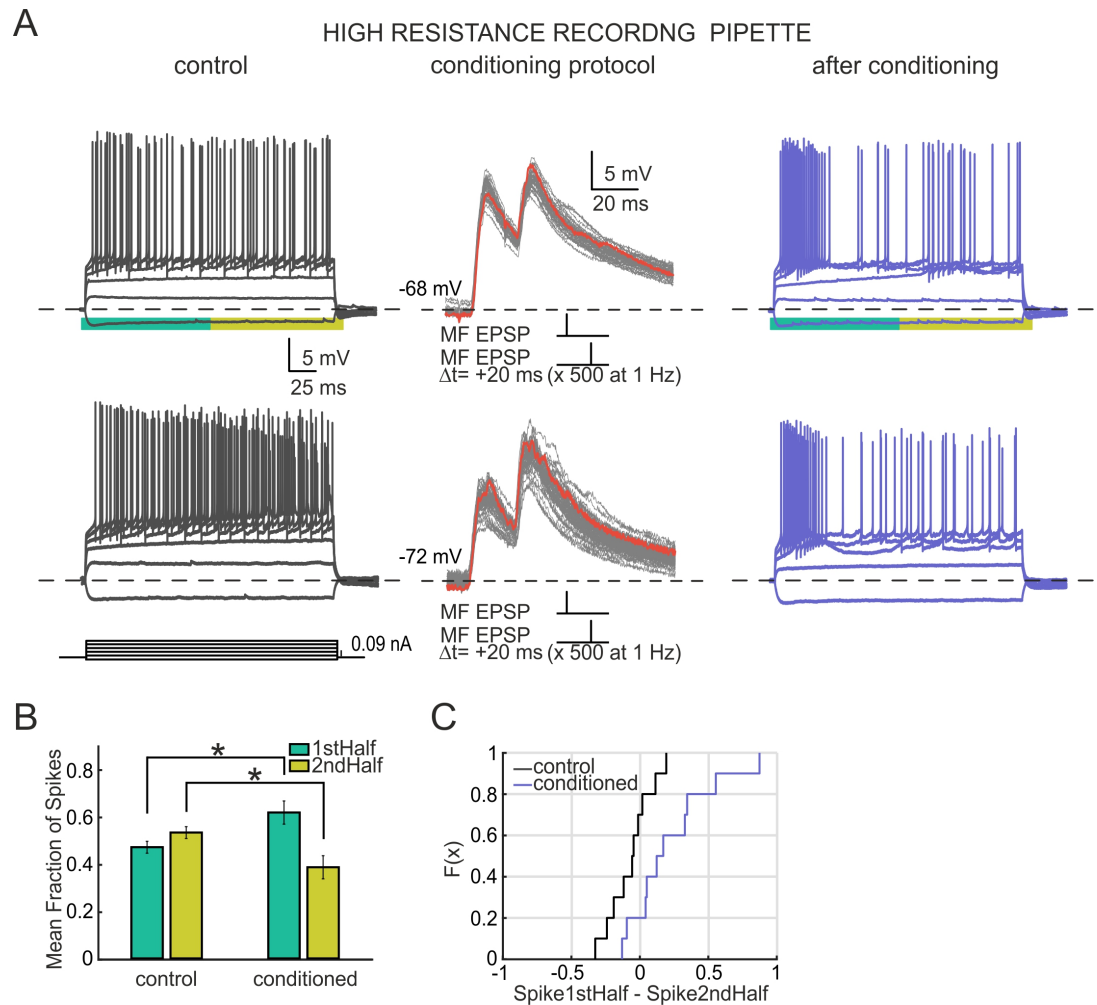

**Figure S2. Firing pattern transitions on CA3 neurons are not induced by intracellular dialysis.** A) Two cells patched with high resistance pipettes (10M $\Omega$ ). Two sample control cells that exhibit non-adapting (upper panel) and accelerating (lower panel) firing pattern. After conditioning, both change to intrinsic burst firing pattern. The mossy fiber stimulation protocol is shown in middle panel. B) Mean Fraction of Spikes for the population in the first and second half of the voltage trace for both control and conditioned cases. A significant redistribution on the fraction of spikes is observed after the conditioning, where the fraction of spikes on the first half is increased while it decreases in the second half ( $n=10$ ,  $p=0.048$ , two-sided Wilcoxon signed rank test). C) Empirical Cumulative Distribution Function for the data shown in B. Every individual case is represented as the number of spikes for the first half of the trace minus the spikes for the second half.

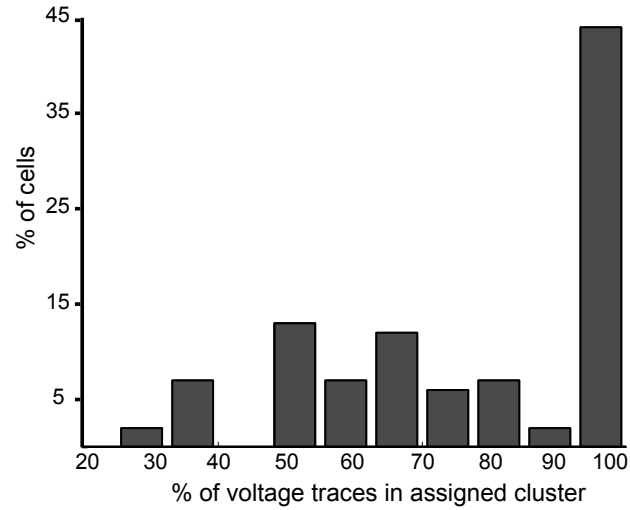

**Figure S3. Clustering performance on the step-wise voltage traces.** The capacity of the clustering algorithm to group together independent voltage traces derived from the same set of current injections was evaluated. Histogram x-axis accounts for the percentage of voltage traces from the same set that are assigned to a unique cluster. Y-axis, shows the percentage of cells that fulfill the x condition. Ideal performance of the algorithm would allocate 100% of voltage traces coming from same set of current injections to the same cluster. For most of the cells, at least half of the voltage traces fall into one cluster, and almost 45% of the cells have all traces (100%) assigned to same cluster (n=50).

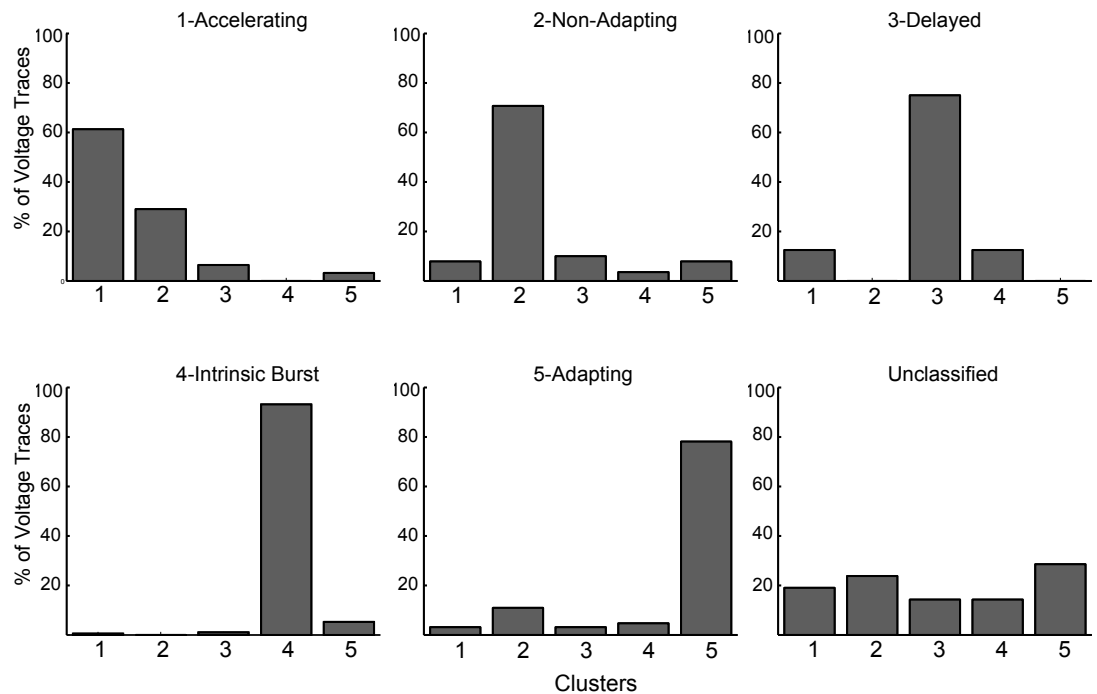

**Figure S4. Misclassified voltage traces from an assigned cell.** Each panel shows the percentage of voltage traces of the cells assigned to a given cluster, which have been assigned by the algorithm to the other clusters. For example, first panel shows that 30% of voltage traces of cells classified as Accelerating fall into the Non-Adapting cluster. At higher current injection the accelerating pattern is lost. Because of high firing rate the algorithm now classifies the traces as non-adapting. Numbers on the x axis correspond to the different cluster classes. 1-Accelerating, 2-Non-Adapting, 3-Delayed, 4-Intrinsic Burst, 5-Adapting. Last panel shows the distribution of voltage traces of unclassified cells. (n=50)

| Conductances Ranges       | 1                   | 2                | 3                  |
|---------------------------|---------------------|------------------|--------------------|
| $g_{Kdr}$                 | 0.015 : 0.05 : 0.04 |                  |                    |
| $g_{Ka}$                  | 0.01 : 0.01 : 0.09  |                  |                    |
| $g_{Ca}$                  | 0                   | 0.2 : 0.1 : 0.6  | 0.8 : 0.1 : 1      |
| $g_{CaK}$                 | 0 : 0.1 : 0.9       |                  |                    |
| $g_{Km}$                  | 0                   | 0.4 : 0.1 : 1    |                    |
| $g_{Kd}$                  | 0 : 0.1 : 0.3       | 0.4 : 0.05 : 0.8 | 0.9 : 0.1 : 1      |
| $I$                       | 0.45 : 0.05 : 0.65  | 0.75 : 0.05 : 1  | 1.75 : 0.05 : 1.95 |
| Total conductance vectors | 861                 |                  |                    |
| Total traces              | 5166                |                  |                    |

**Table S2. Range of maximal conductance values used to generate the model database of voltage traces.** A model database of voltage traces, which includes all the observed experimental firing patterns, was generated by varying 6 maximal conductances ( $g_{Kdr}$ ,  $g_{Ka}$ ,  $g_{Ca}$ ,  $g_{CaK}$ ,  $g_{Km}$  and  $g_{Kd}$ ) over a given range. Each row in the table lists the ranges of conductance values employed in every channel. The different ranges of conductances (columns) were produced in order to account for the different firing patterns reproduced in the model. Different ranges of current were also needed to reveal the different firing types. A total of 861 conductance vectors were generated by combining the different conductances. The firing pattern of every conductance vector was produced at several levels of step-current injection, obtaining a total of 5166 voltage traces. Note that  $g_{CaT}$ ,  $g_{CaN}$  and  $g_{CaL}$  are englobed under the single parameter  $g_{Ca}$ .

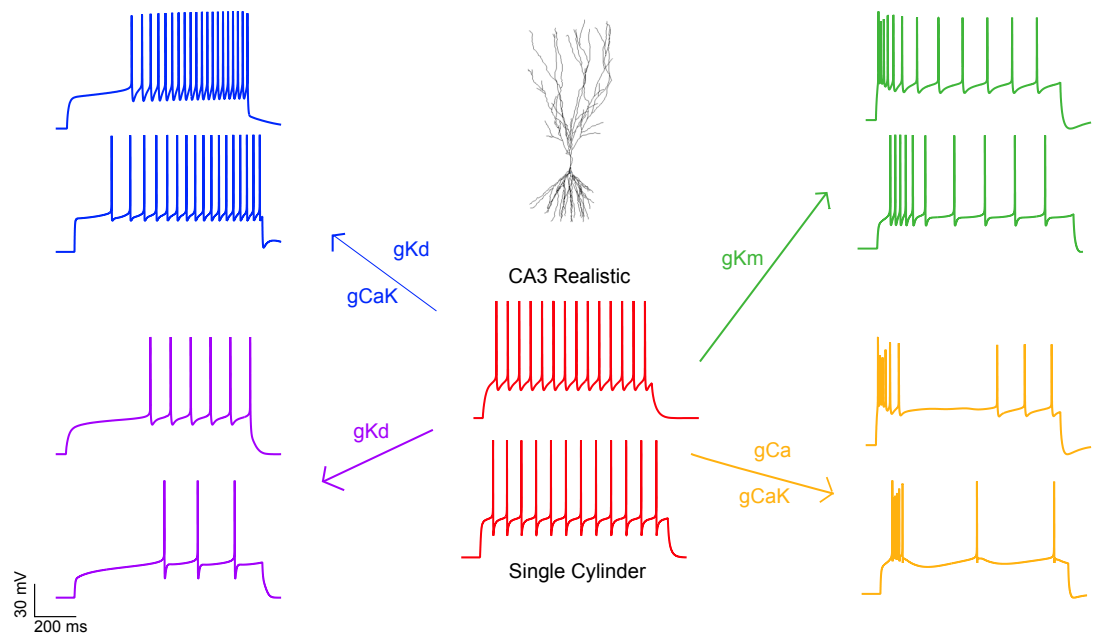

**Figure S5. Firing pattern transitions can be reproduced in both, a single compartment model and a realistic CA3 pyramidal model.** We find that the key ion channels responsible of the firing pattern transitions are kept in both the single compartment model and the realistic one. The upper trace represents the model traces reproduced on the CA3 realistic pyramidal cell, and below the same firing pattern on the single cylinder is shown. The maximal conductance values used to reproduce every pattern are shown in the Supplementary Table 2.



### Calcium Accumulation under the Stimulation Protocol

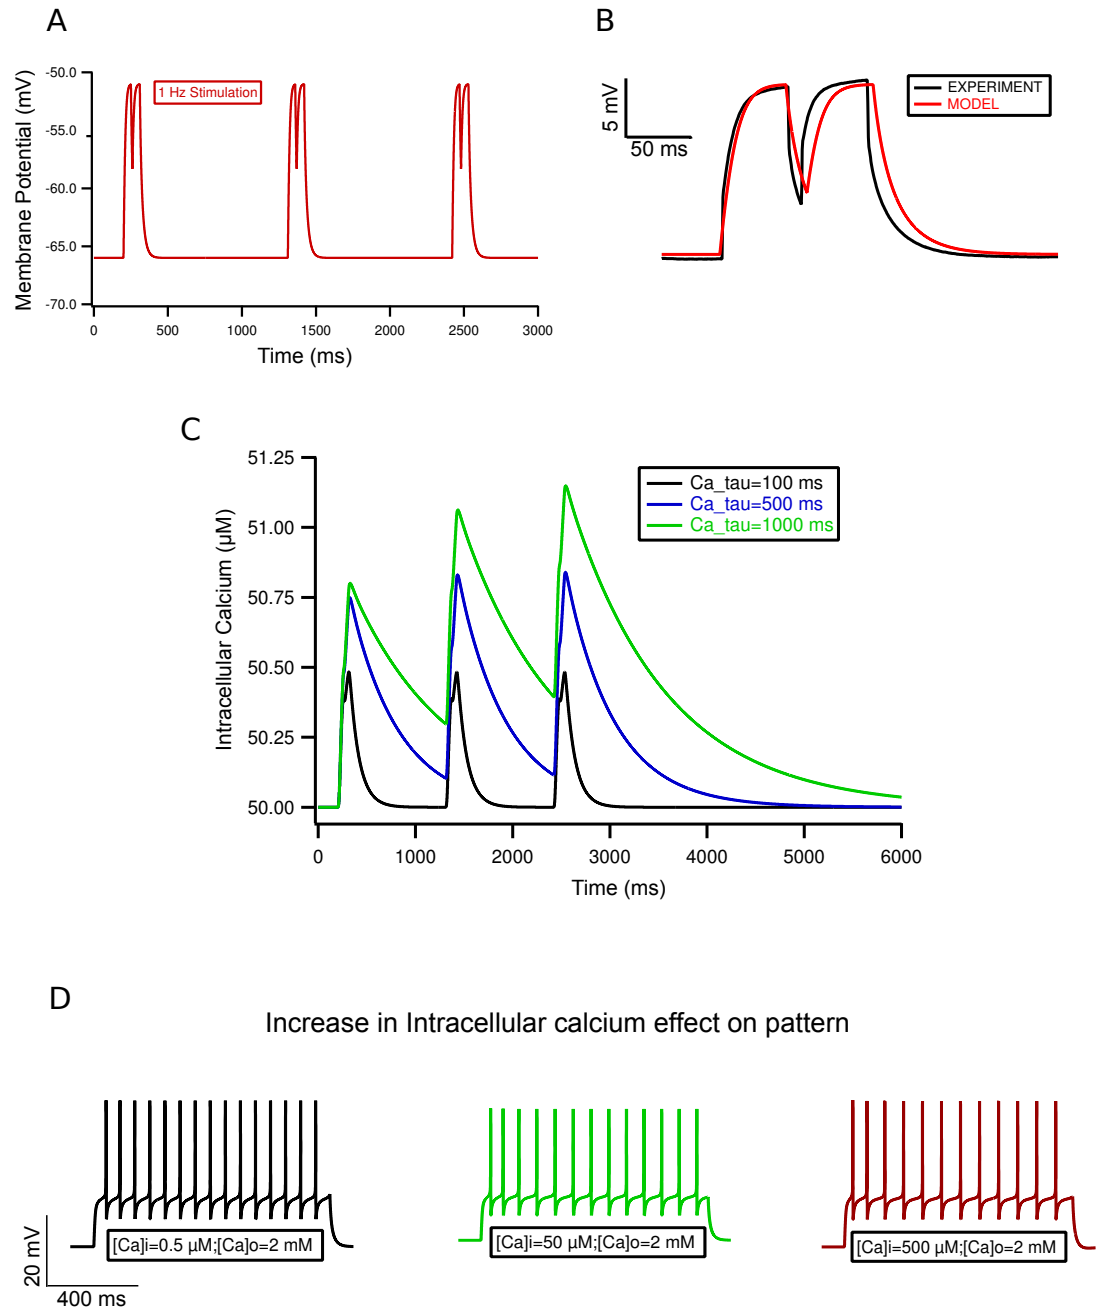

**Figure S6. Firing pattern transitions in the model are not due to calcium accumulation.** A) Protocol applied to the model cell: 1 Hz current stimulation by double current pulses that elicited a depolarization of 10 mV, repeated 500 times. B) Comparison of model pulses with those elicited in the soma of experimental cells. C) Due to kinetics of calcium decay, the ion does not accumulate over period of stimulation (black trace). Decay must be much longer for calcium to accumulate significantly (green trace). D) Hypothetical increase in intracellular increase has little effect on pattern of discharge, even when increased 1000 fold (from left to right).

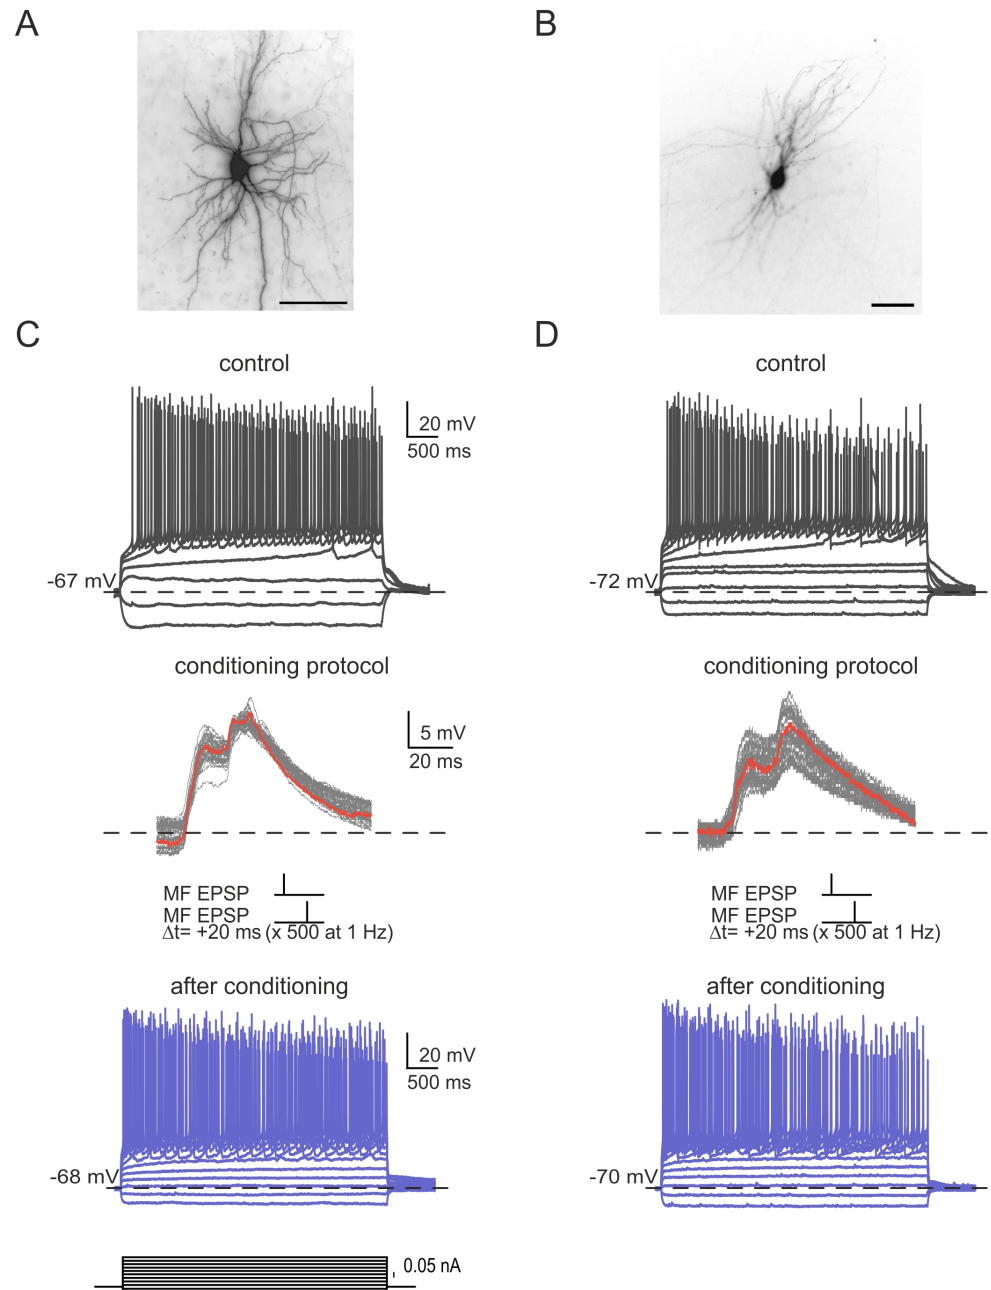

**Figure S7. Selected cells with high frequency firing do not switch to adapting or intrinsic burst firings.** A) Biocytin filled spiny cell with stellate morphology. B) Smooth cell with rounded somata and short dense dendritic arbor. Firing patterns in control (upper) and after stimulation (bottom) are shown beneath each cell for both the stellate (C) and the smooth cell (D). The neurons present a non-adapting pattern both, before and after conditioning. Middle panel shows EPSPs elicited in the cell via mossy fiber stimulation. Note that after conditioning, cells do not change the generic Petilla firing pattern mode (Fast Spiking), although there is a visible modulation on the delay to first spike ('ramping response'). Scale bar =  $50\mu\text{m}$
